# Supplementary material for: Triarylborane-triphenylamine based luminophore for the mitochondria targeted live cell imaging and colorimetric detection of aqueous fluoride
Source: Royal Society of Chemistry journal article supplement (doi:10.1039/d2dt01887j), 2022-01-01
Supplement: d2dt01887j1.pdf [file d2dt01887j1.pdf]

# **Triarylborane-Triphenylamine Based Luminophore for Mitochondria Targeted Live Cell Imaging and Colorimetric Detection of Aqueous Fluoride**

Chinna Ayya Swamy P<sup>†\*</sup>, Archana V Raveendran<sup>†</sup>, Narra Sivakrishna<sup>‡</sup>, and Rajendra Prasad Nandi<sup>‡</sup>

<sup>†</sup> Main group Organometallics Materials, Supramolecular Chemistry and Catalysis lab, Department of Chemistry, National Institute of Technology, Calicut, India-673601.

<sup>‡</sup> Humanities & Sciences, Vallurupalli Nageswara Rao Vignana Jyothi Institute of Engineering and Technology, Hyderabad, India-500090.

<sup>‡</sup> Inorganic and Physical Chemistry Department, Indian Institution of Science, Bangalore-560 012, India.

*E-mail:* [swamy@nitc.ac.in](mailto:swamy@nitc.ac.in)

## **TABLE OF CONTENTS**

|                                                                               |              |
|-------------------------------------------------------------------------------|--------------|
| 1) Characterization Data                                                      | Page S2-S14  |
| 2) Optical Properties                                                         | Page S15-S19 |
| 3) Anion Binding Studies                                                      | Page S19-S30 |
| 4) Cytotoxicity Study                                                         | Page S31     |
| 5) pH and photostability                                                      | Page S32     |
| 6) DFT computational data                                                     | Page S32-S47 |
| 7) Comparison table water soluble organometallic compounds with fluoride ions | Page S47-S51 |
| 8) References                                                                 | Page S51-S52 |

## Characterization Data

### NMR Characterization:

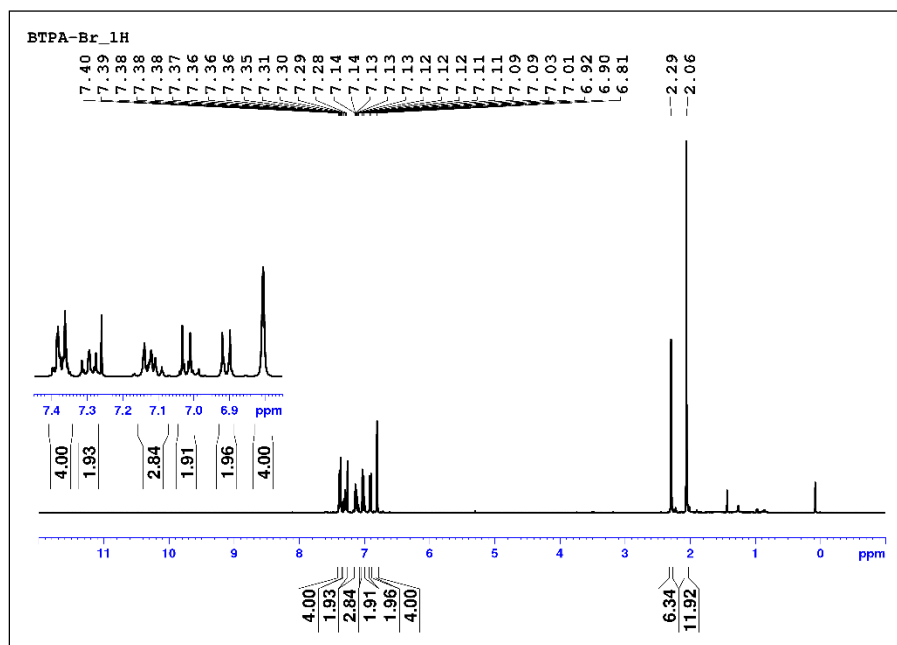

**Figure S1.** <sup>1</sup>H NMR spectra of BTPA-Br

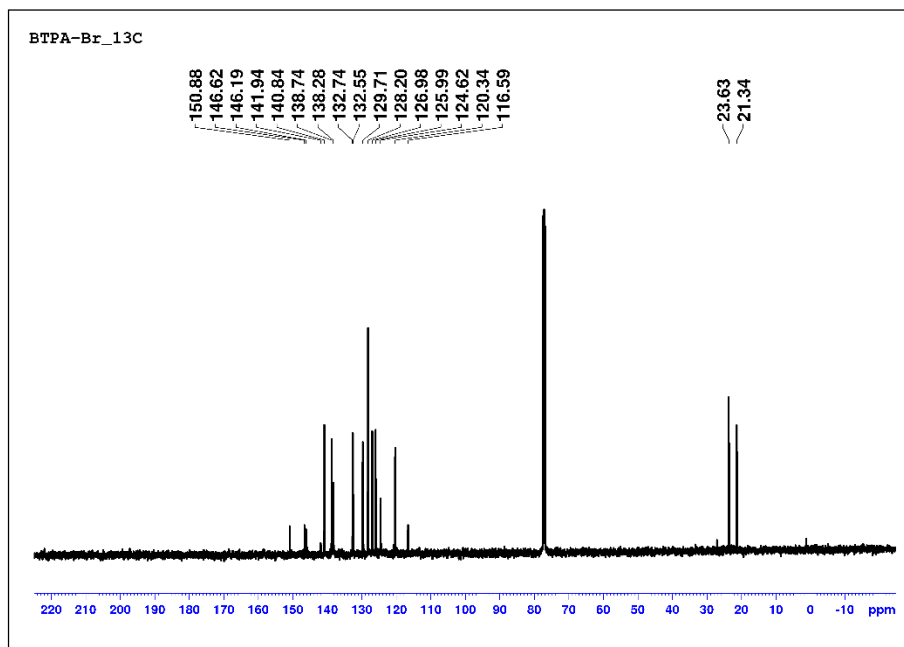

**Figure S2.** <sup>13</sup>C NMR spectra of BTPA-Br

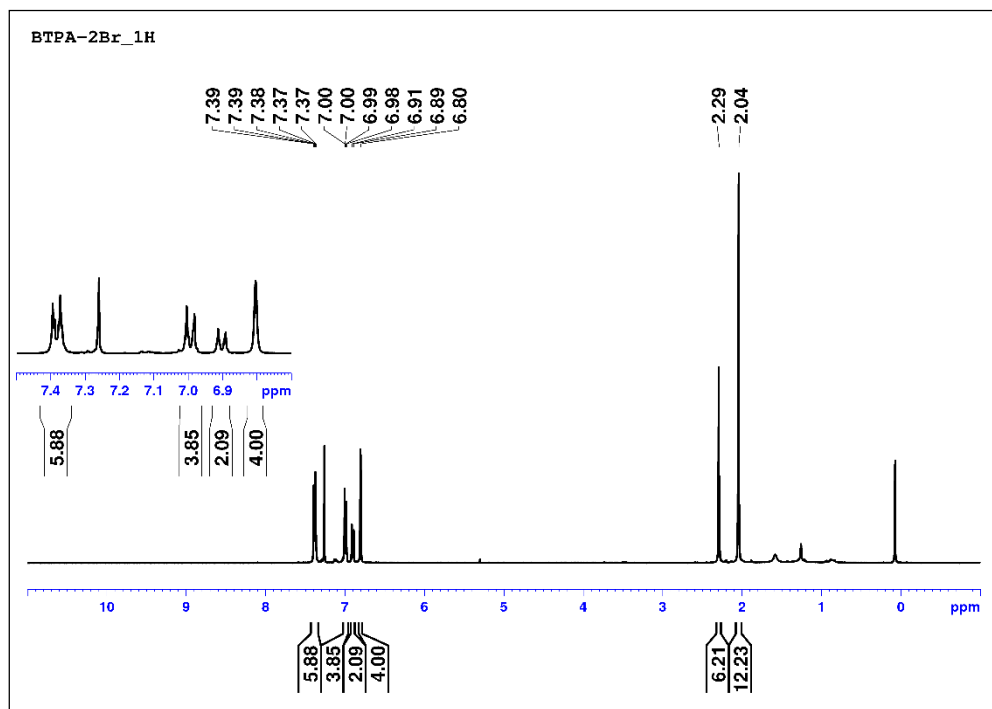

**Figure S3.**  $^1\text{H}$  NMR spectra of **BTPA-2Br**

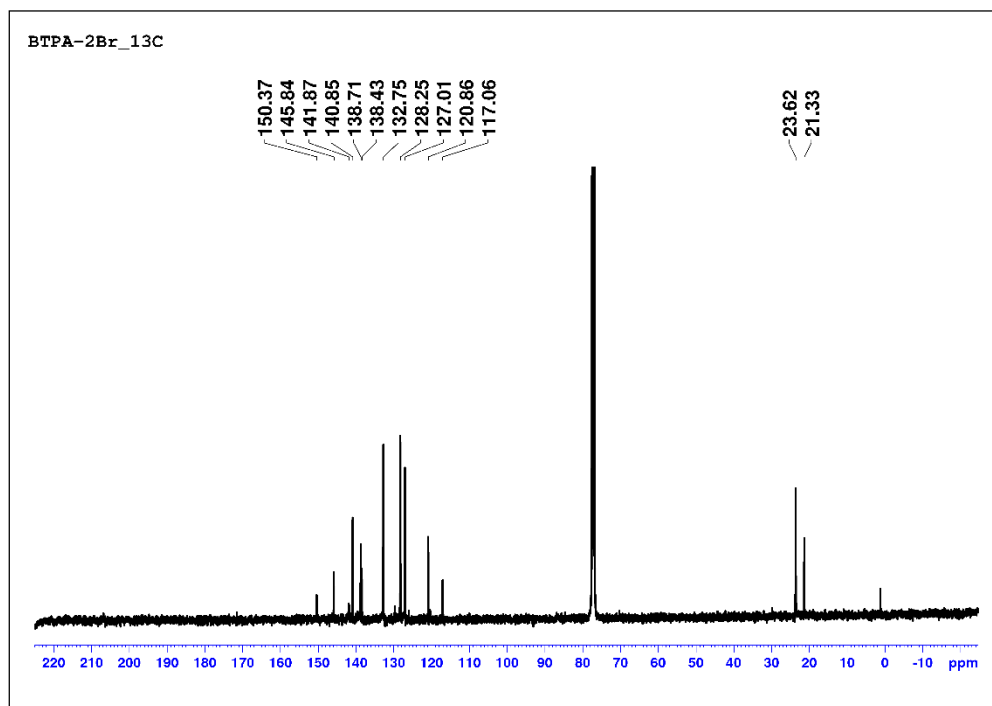

**Figure S4.**  $^{13}\text{C}$  NMR spectra of **BTPA-2Br**

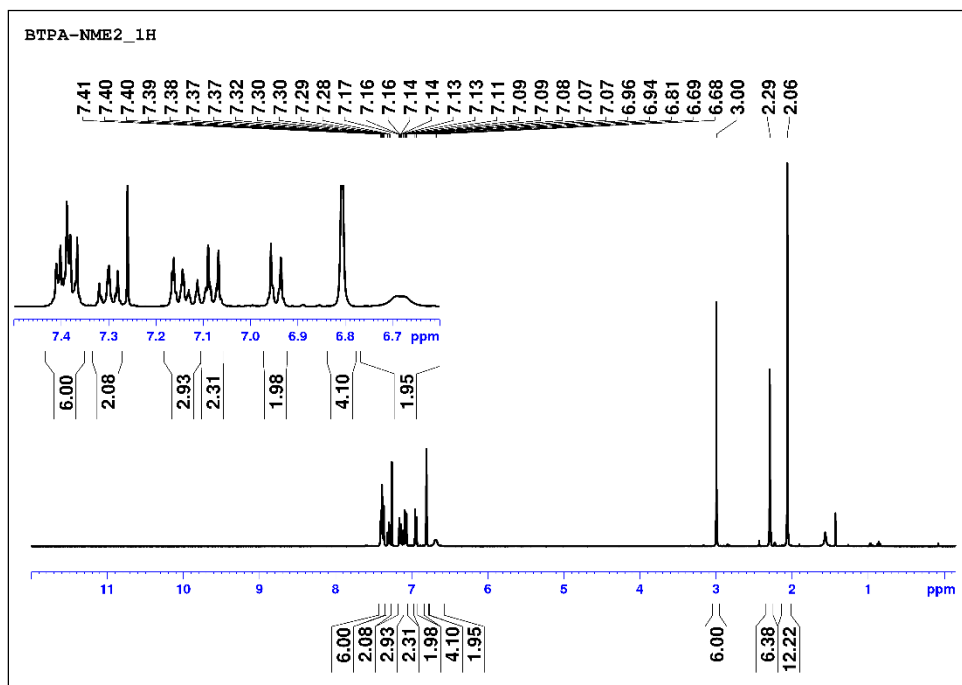

**Figure S5.**  $^1\text{H}$  NMR spectra of **BTPA-NMe<sub>2</sub>**

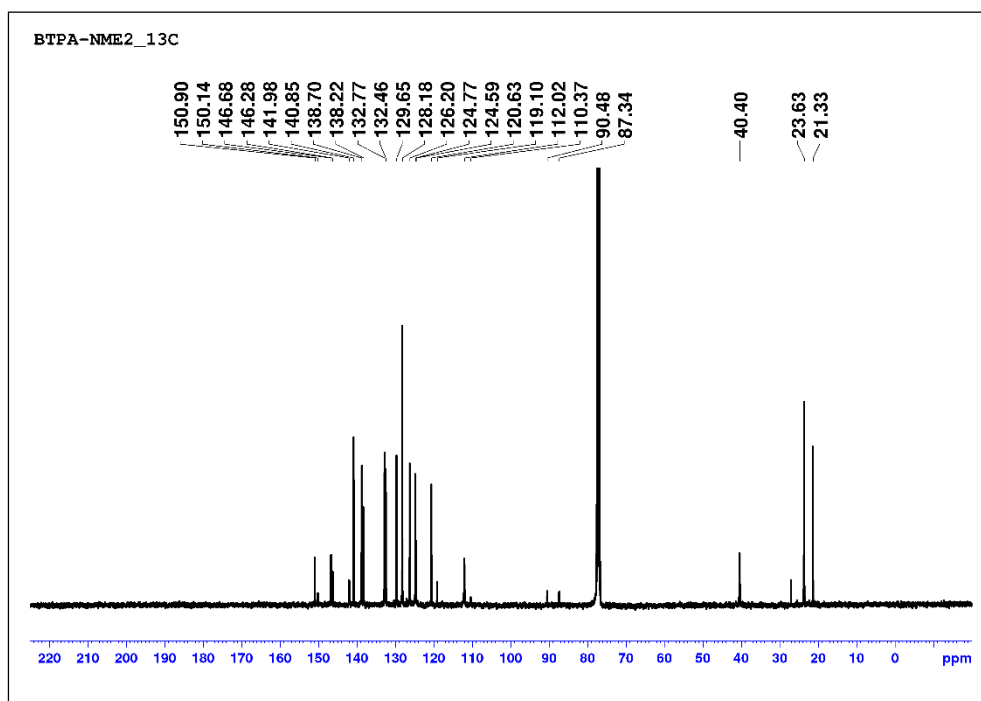

**Figure S6.**  $^{13}\text{C}$  NMR spectra of **BTPA-NMe<sub>2</sub>**

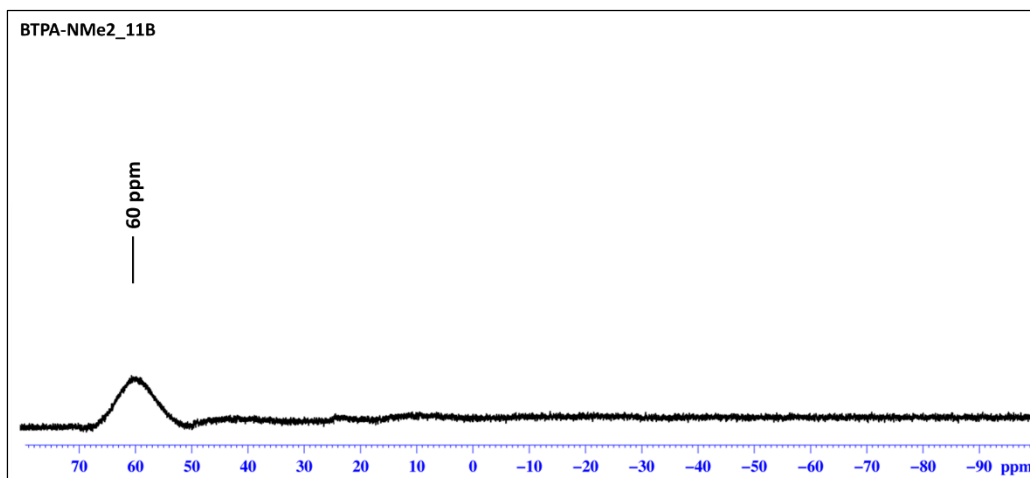

Figure S7.  $^{11}\text{B}$  NMR spectra of BTPA-NMe<sub>2</sub>

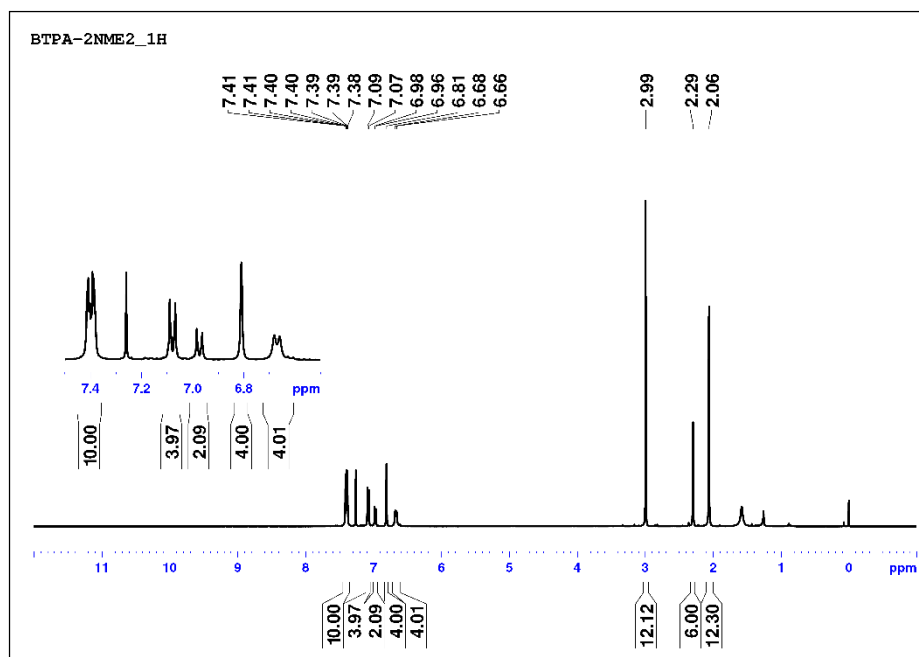

Figure S8.  $^1\text{H}$  NMR spectra of BTPA-2NMe<sub>2</sub>

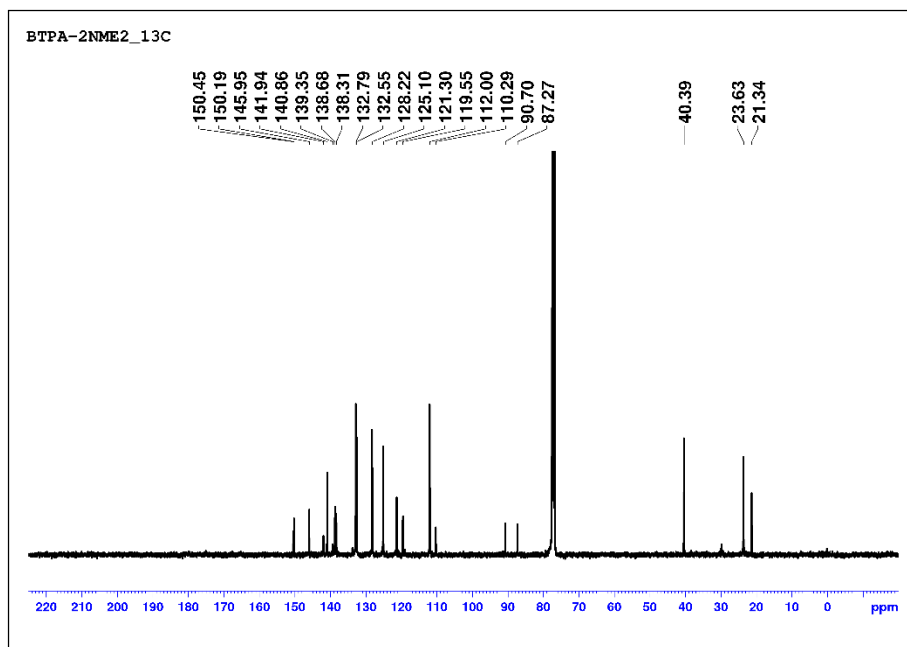

Figure S9.  $^{13}\text{C}$  NMR spectra of BTPA-NMe<sub>2</sub>

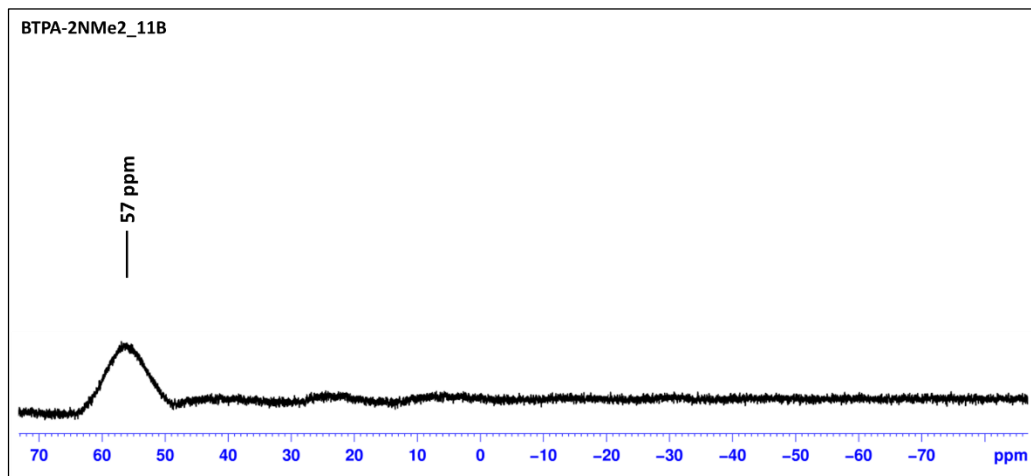

Figure S10.  $^{11}\text{B}$  NMR spectra of BTPA-2NMe<sub>2</sub>

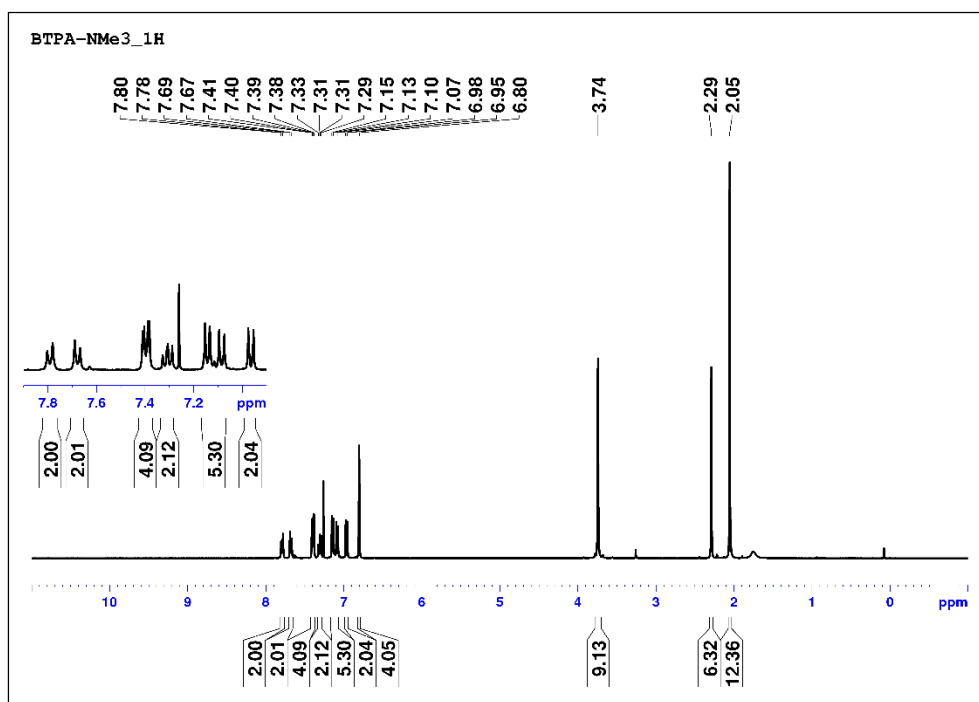

Figure S11.  $^1\text{H}$  NMR spectra of **1**

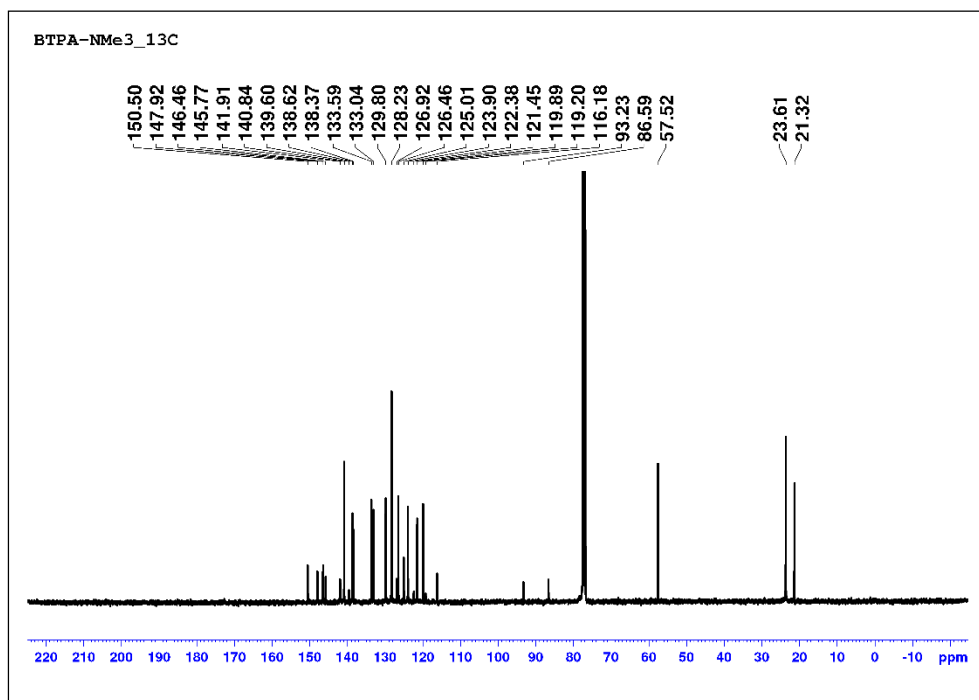

Figure S12.  $^{13}\text{C}$  NMR spectra of **1**

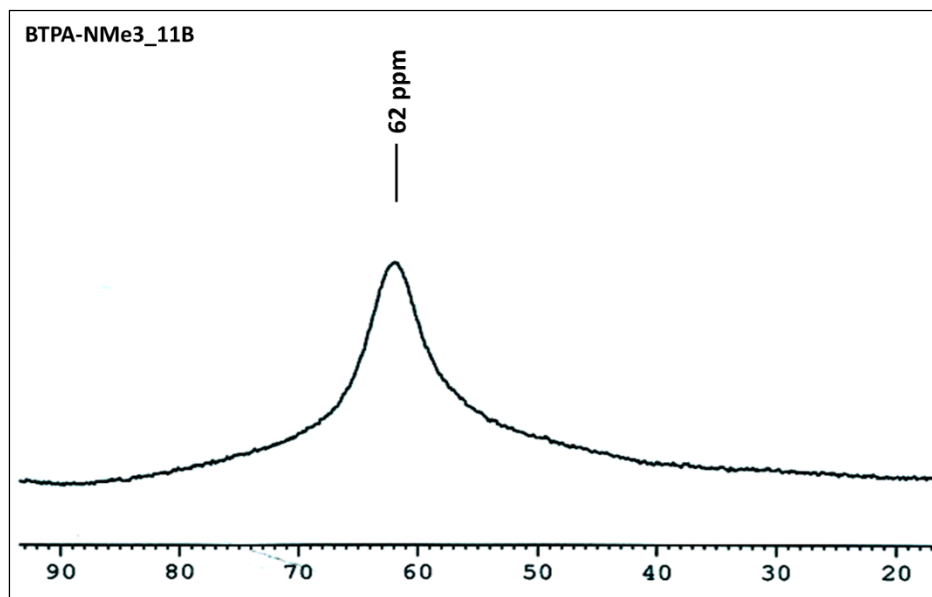

Figure S13.  $^{11}\text{B}$  NMR spectra of **1**

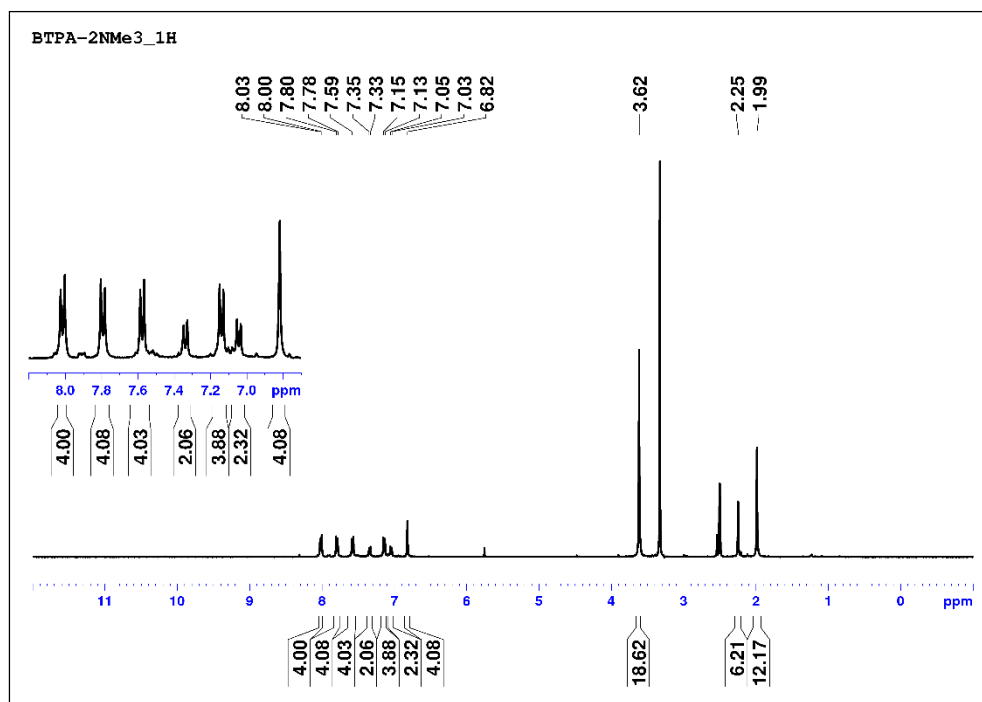

Figure S14.  $^1\text{H}$  NMR spectra of **2**



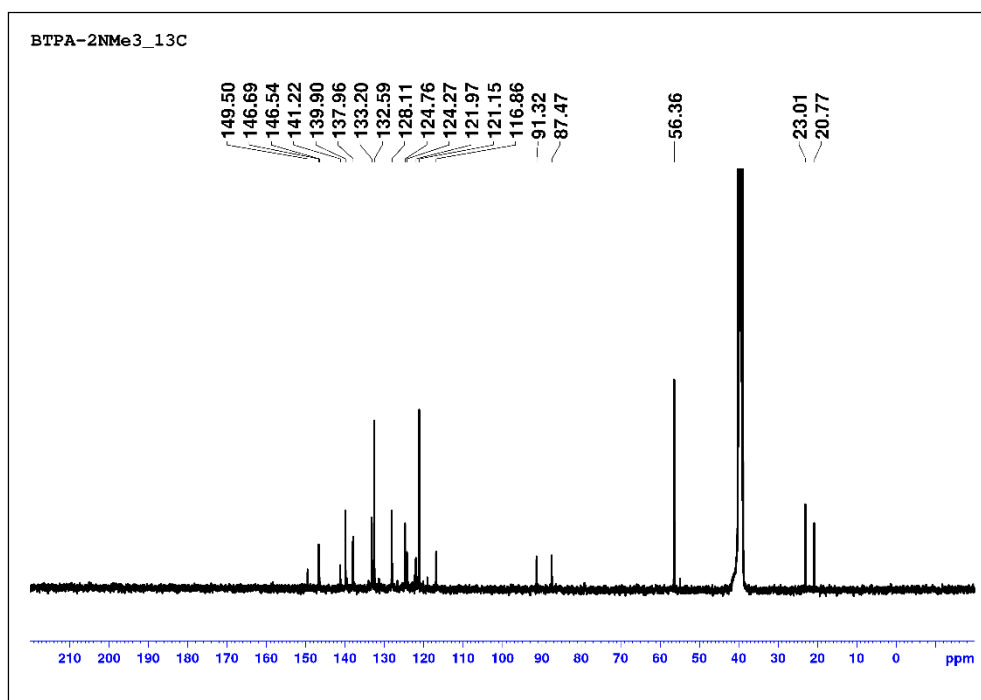

Figure S15.  $^{13}\text{C}$  NMR spectra of **2**

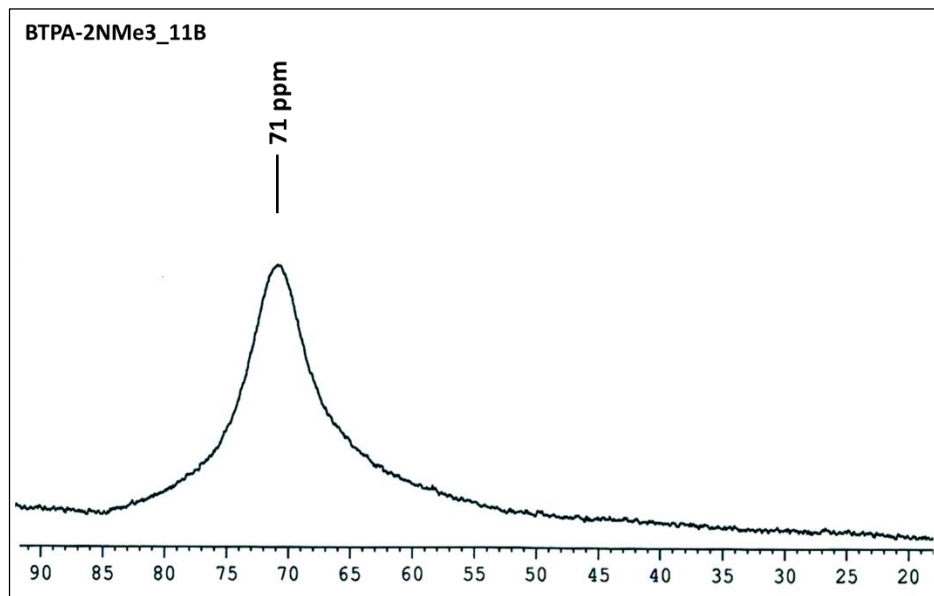

Figure S16.  $^{11}\text{B}$  NMR spectra of **2**

## HRMS Characterization

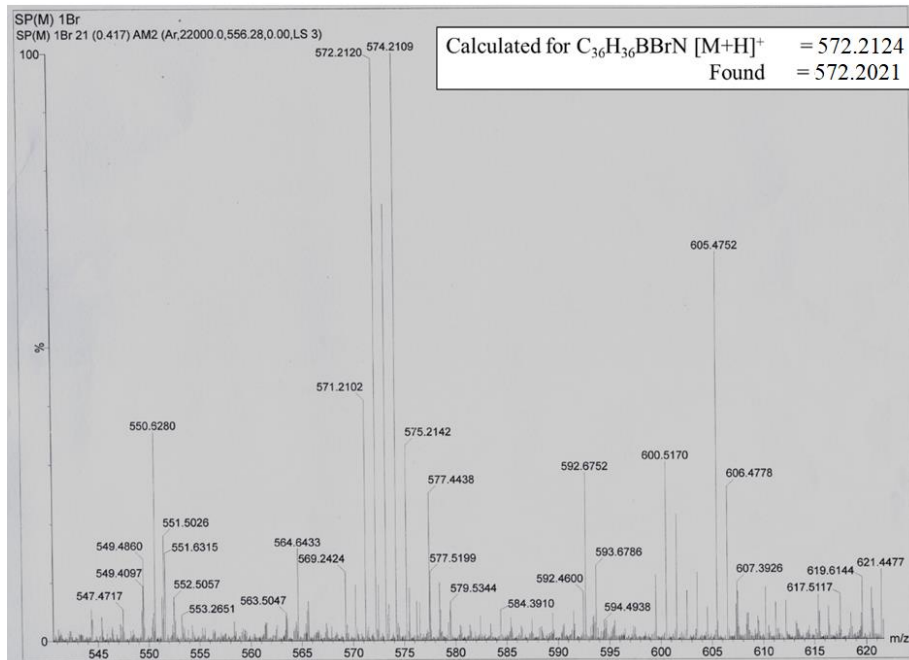

Figure S17. HRMS of BTPA-Br

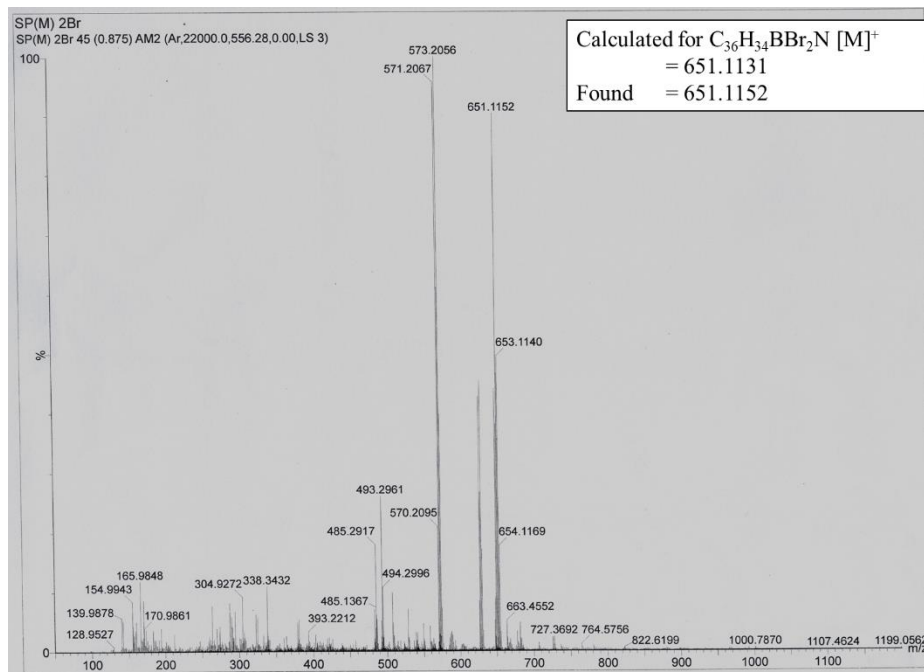

Figure S18. HRMS of BTPA-2Br

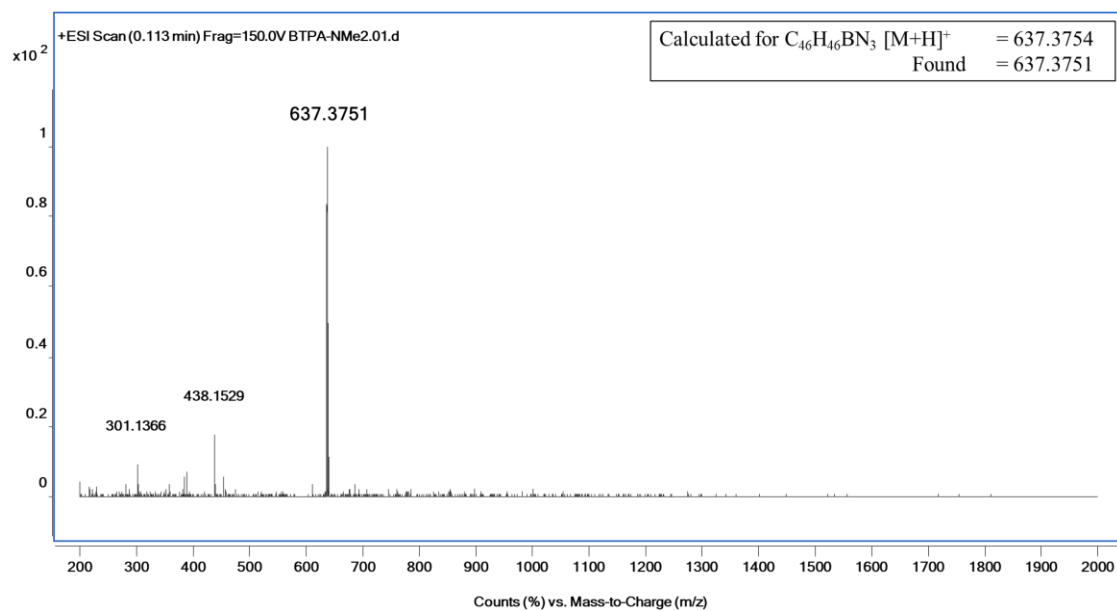

**Figure S19. HRMS of BTPA-NMe<sub>2</sub>**

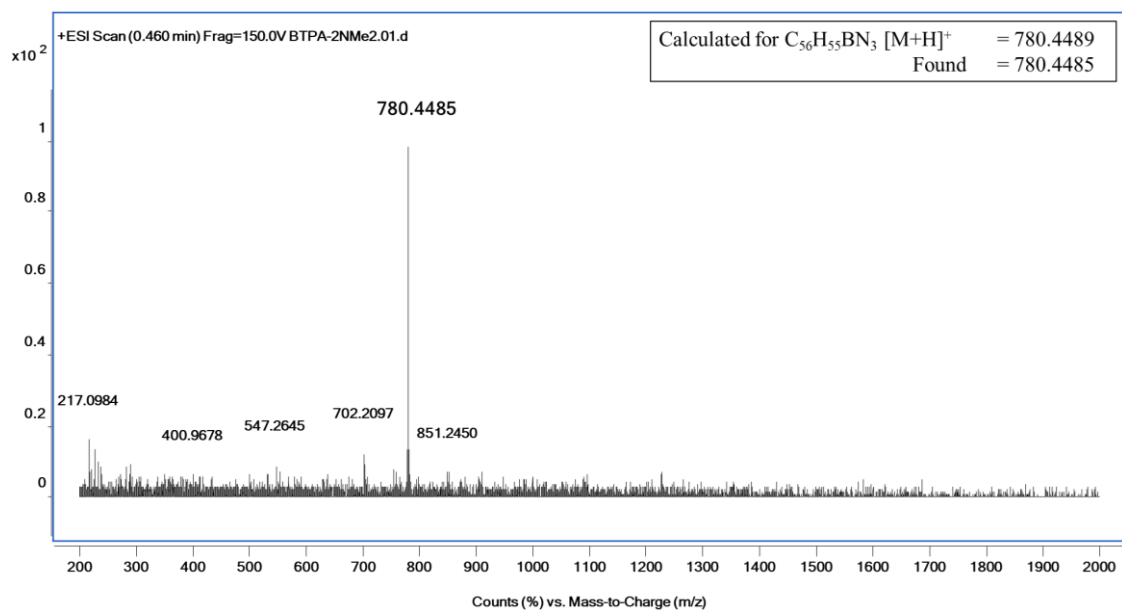

**Figure S20. HRMS of BTPA-2NMe<sub>2</sub>**

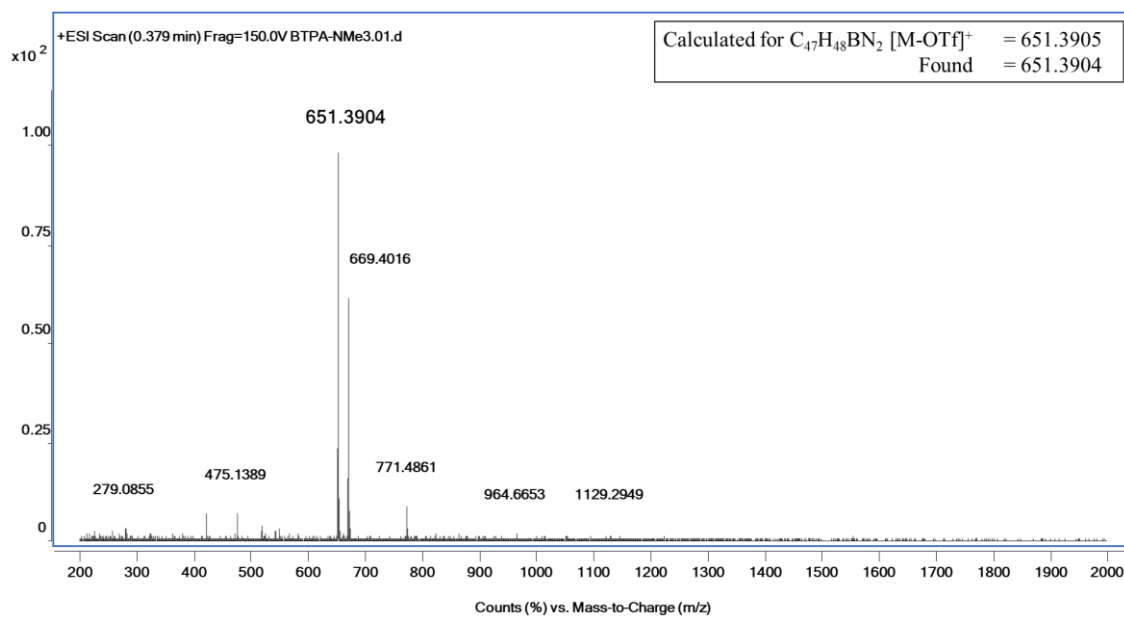

**Figure S21. HRMS of 1**

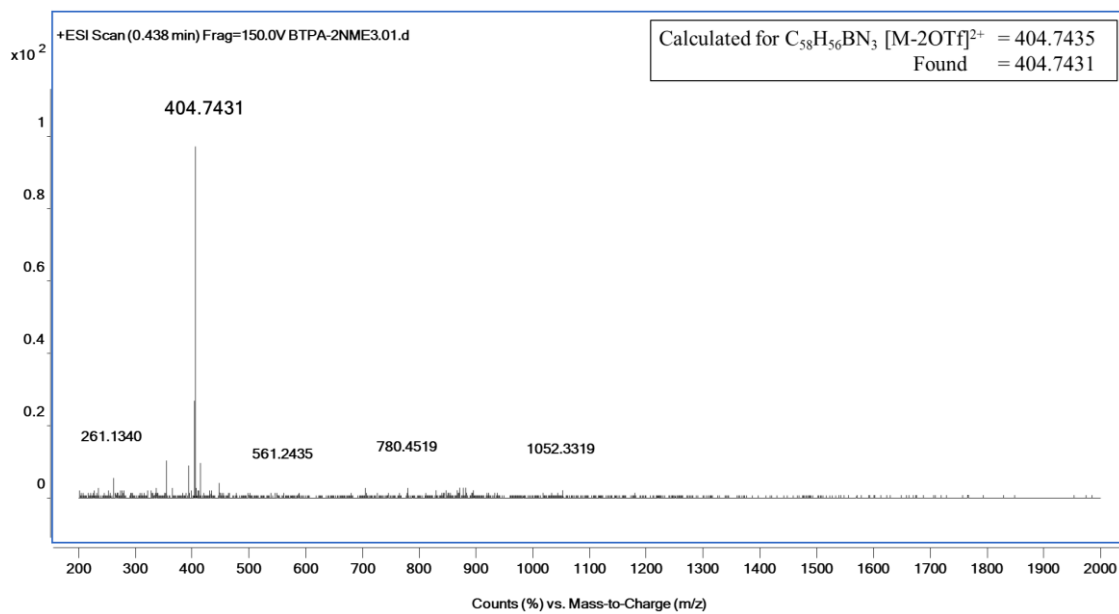

**Figure S22. HRMS of 2**

### Single Crystal XRD Characterization:

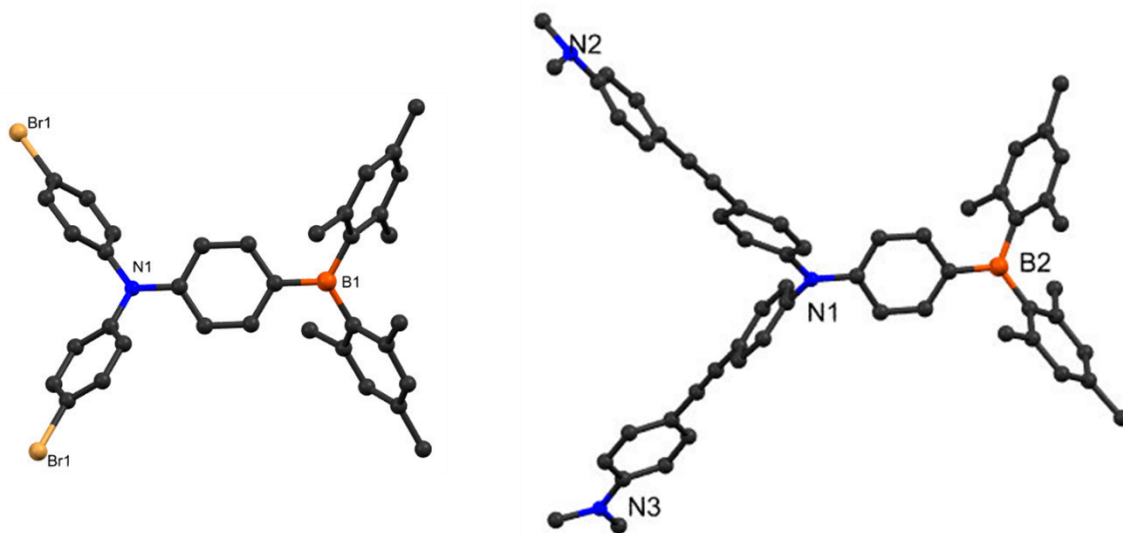

**Figure S23.** Molecular structures of **BTPA-2Br** (left) and **BTPA-2NMe<sub>2</sub>** (right) obtained from Single Crystal X-Ray Diffraction measurements (**H** atoms are omitted for clarity).

**Table S1.** Selected crystallographic data for structures **BTPA-2Br** and **BTPA-2NMe<sub>2</sub>**.

|                      | <b>BTPA-2Br</b>                                                                          | <b>BTPA-2NMe<sub>2</sub></b>                                                                           |
|----------------------|------------------------------------------------------------------------------------------|--------------------------------------------------------------------------------------------------------|
| Empirical formula    | C <sub>18</sub> H <sub>17</sub> B <sub>0.50</sub> Br N <sub>0.50</sub>                   | C <sub>112</sub> H <sub>108</sub> B <sub>2</sub> N <sub>6</sub>                                        |
| Formula weight       | 325.64                                                                                   | 1559.66                                                                                                |
| Temperature          | 295(2) K                                                                                 | 100(2) K                                                                                               |
| Wavelength           | 0.71073 Å                                                                                | 0.71073 Å                                                                                              |
| Crystal system       | Monoclinic                                                                               | Triclinic                                                                                              |
| Space group          | <i>C</i> 2/c                                                                             | <i>P</i> -1                                                                                            |
| Unit cell dimensions | a = 19.682(5) Å; α = 90°<br>b = 14.346(3) Å; β = 104.682(6)°<br>c = 12.215(3) Å; γ = 90° | a = 13.122(2) Å; α = 76.429(4)°<br>b = 19.080(4) Å; β = 77.166(4)°<br>c = 19.964(4) Å; γ = 76.851(4)°. |
| Volume               | 3336.2(13) Å <sup>3</sup>                                                                | 4655.6(15) Å <sup>3</sup>                                                                              |

|                                   |                                    |                                    |
|-----------------------------------|------------------------------------|------------------------------------|
| Z                                 | 8                                  | 2                                  |
| Density(calculated)               | 1.297 Mg/m <sup>3</sup>            | 1.113 Mg/m <sup>3</sup>            |
| Theta range for data collection   | 3.323 to 27.559°                   | 2.993 to 25.000°                   |
| Index ranges                      | -25<=h<=25, -18<=k<=18, -15<=l<=15 | -15<=h<=15, -22<=k<=22, -23<=l<=23 |
| Reflections collected             | 49667                              | 56898                              |
| Independent reflections           | 3839 [R(int) = 0.1495]             | 14778 [R(int) = 0.1088]            |
| Completeness to theta = 24.999°   | 99.8 %                             | 90.0 %                             |
| Goodness-of-fit on F <sup>2</sup> | 0.994                              | 1.044                              |
| Final R indices [I>2sigma(I)]     | R1 = 0.0546, wR2 = 0.0977          | R1 = 0.1235, wR2 = 0.3115          |
| R indices (all data)              | R1 = 0.1952, wR2 = 0.1323          | R1 = 0.2470, wR2 = 0.3456          |
| Largest diff. peak and hole       | 0.410 and -0.407 e.Å <sup>-3</sup> | 0.467 and -0.371 e.Å <sup>-3</sup> |
| CCDC number                       | 1975082                            | 1975083                            |

## Optical Properties

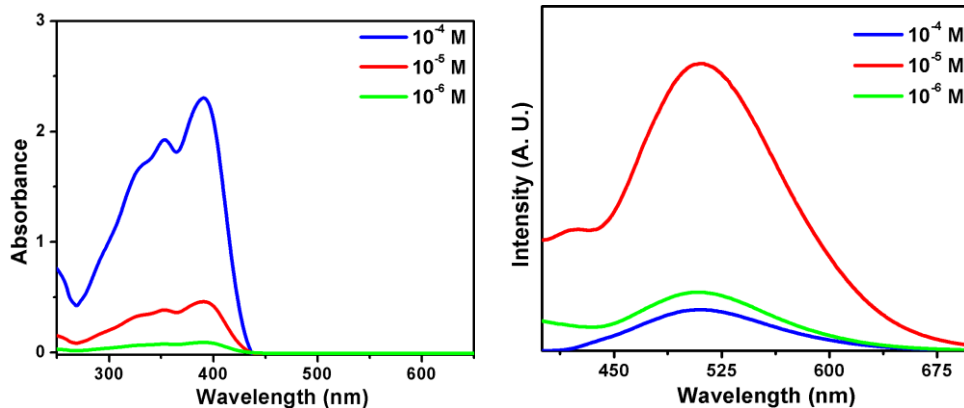

**Figure S24:** UV-Visible (left) and fluorescence (right) spectra of **BTPA-NMe<sub>2</sub>** in CH<sub>3</sub>CN at various concentrations ( $\lambda_{\text{ex}}$  at 375 nm)

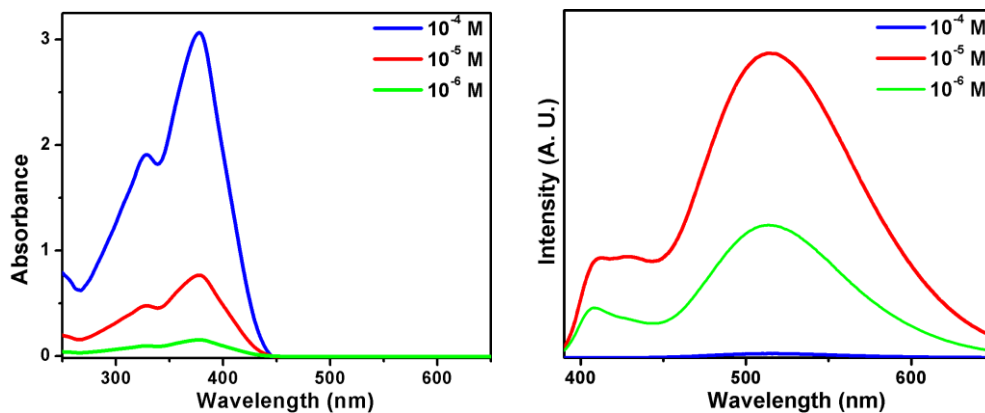

**Figure S25:** UV-Visible (left) and fluorescence (right) spectra of **BTPA-2NMe<sub>2</sub>** in CH<sub>3</sub>CN at various concentrations ( $\lambda_{\text{ex}}$  at 375 nm)

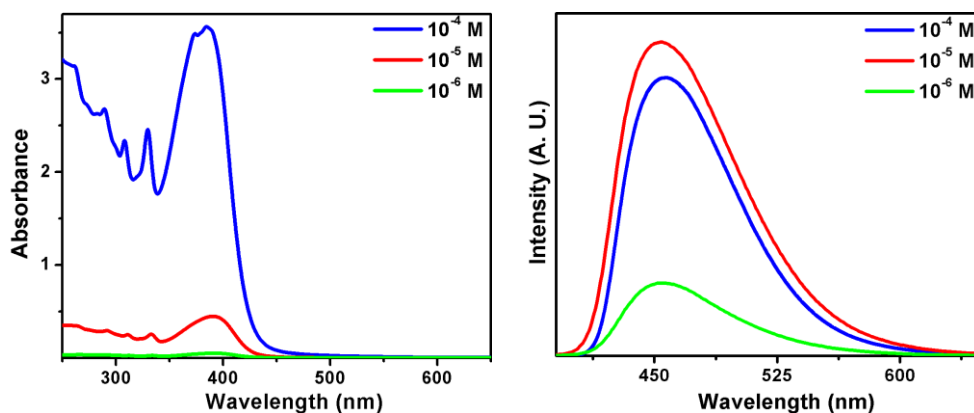

**Figure S26:** UV-Visible (left) and fluorescence (right) spectra of **1** in CH<sub>3</sub>CN at various concentrations ( $\lambda_{\text{ex}}$  at 375 nm)

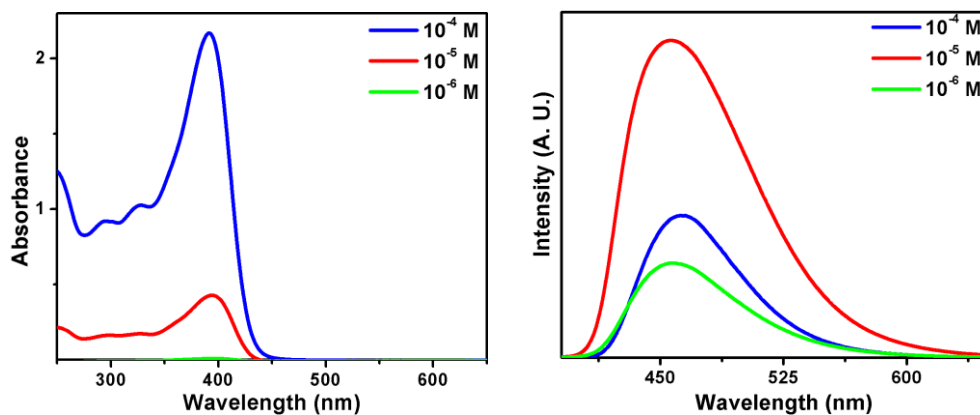

**Figure 27:** UV-Visible (left) and fluorescence (right) spectra of **1** in  $\text{CH}_3\text{CN}$  at various concentrations ( $\lambda_{\text{ex}}$  at 375 nm)

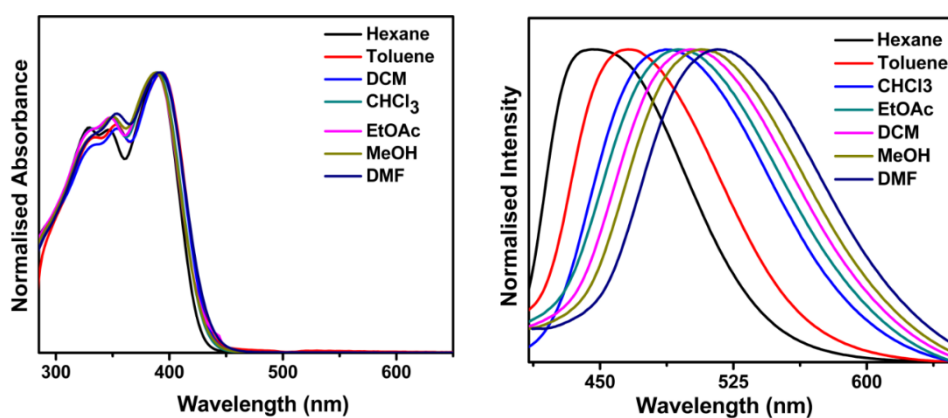

**Figure 28:** Normalized UV-Visible (right) and Fluorescence (left) spectra of **BTPA-NMe<sub>2</sub>** in solvents with different polarity (10  $\mu\text{M}$ ;  $\lambda_{\text{ex}}$  at 375 nm)

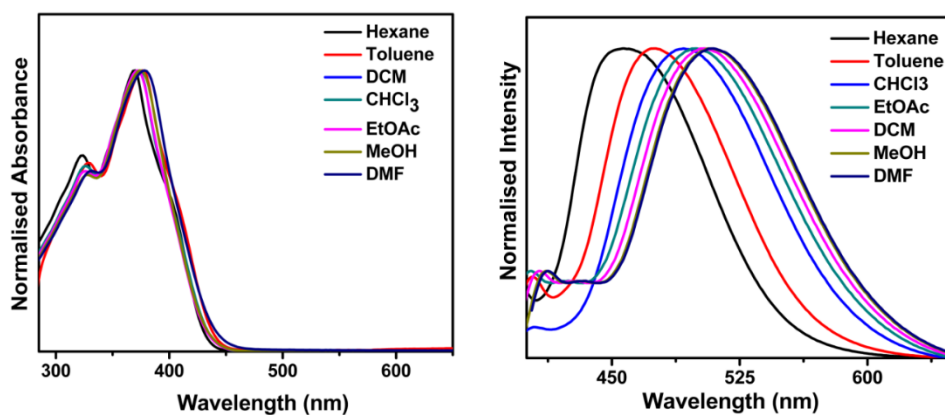

**Figure 29:** Normalized UV-Visible (right) and Fluorescence (left) spectra of **BTPA-2NMe<sub>2</sub>** in solvents with different polarity (10  $\mu\text{M}$ ;  $\lambda_{\text{ex}}$  at 375 nm)



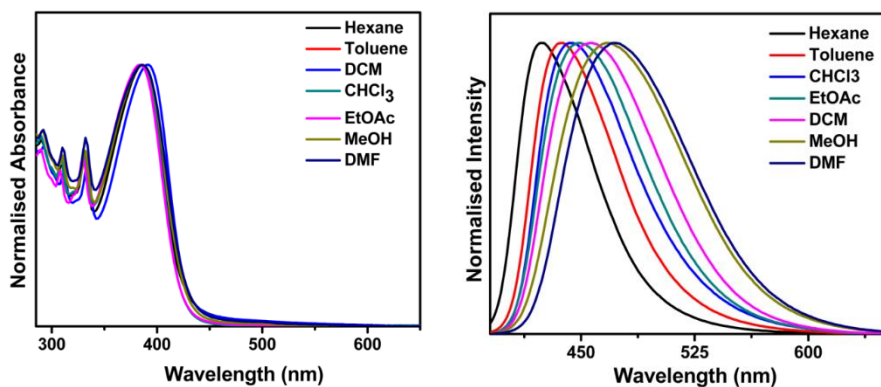

**Figure 30:** Normalized UV-Visible (right) and Fluorescence (left) spectra of **1** in solvents with different polarity (10  $\mu$ M;  $\lambda_{\text{ex}}$  at 375 nm)

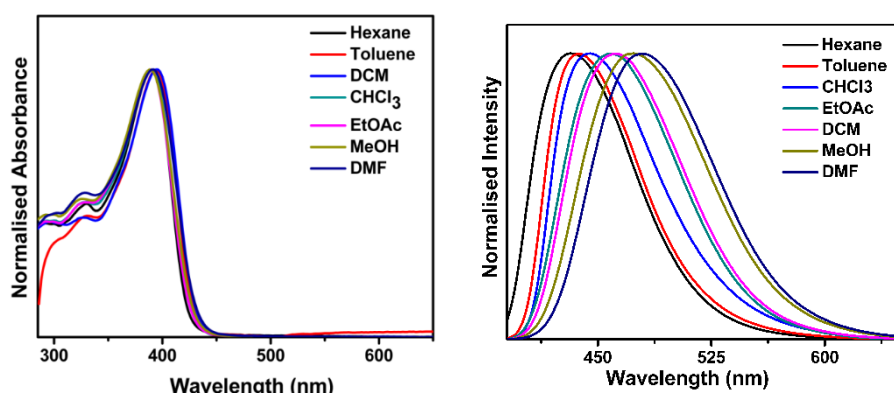

**Figure 31:** Normalized UV-Visible (right) and fluorescence (left) spectra of **2** in solvents with different polarity (10  $\mu$ M;  $\lambda_{\text{ex}}$  at 375 nm)

**Table S2:** Optical data of **BTPA-NMe<sub>2</sub>** in different solvents

| Solvents                 | $\lambda_{\text{abs}}$ | $\lambda_{\text{em}}$ | $\lambda_{\text{abs}} - \lambda_{\text{em}}$ (nm);<br>( $\text{cm}^{-1}$ ) | Quantum<br>yields (%) | Life<br>time<br>(ns) | Radiative decay<br>constant ( $10^8/\text{s}$ ) | Non-radiative<br>decay constant<br>( $10^8/\text{s}$ ) |
|--------------------------|------------------------|-----------------------|----------------------------------------------------------------------------|-----------------------|----------------------|-------------------------------------------------|--------------------------------------------------------|
| Hexane                   | 389                    | 446                   | 57; (3291)                                                                 | 68                    | 1.53                 | 4.43                                            | 2.09                                                   |
| Toluene                  | 393                    | 466                   | 73; (3986)                                                                 | 66                    | 1.14                 | 5.79                                            | 2.98                                                   |
| $\text{CHCl}_3$          | 393                    | 486                   | 97; (4849)                                                                 | 62                    | 1.72                 | 3.61                                            | 2.21                                                   |
| EtOAc                    | 389                    | 496                   | 107; (5131)                                                                | 41                    | 1.95                 | 2.15                                            | 3.31                                                   |
| $\text{CH}_2\text{Cl}_2$ | 387                    | 501                   | 114; (5879)                                                                | 21                    | 2.39                 | 1.13                                            | 3.31                                                   |
| $\text{CH}_3\text{CN}$   | 390                    | 505                   | 115; (5840)                                                                | 16                    | 2.45                 | 0.65                                            | 3.43                                                   |
| MeOH                     | 387                    | 508                   | 121; (6154)                                                                | 2                     | 2.01                 | 0.099                                           | 4.86                                                   |
| DMF                      | 391                    | 515                   | 124; (6158)                                                                | 1                     | 2.59                 | 0.033                                           | 3.98                                                   |

**Table S3:** Optical data of **BTPA-2NMe<sub>2</sub>** in different solvents

| Solvents                        | $\lambda_{\text{abs}}$<br>(nm) | $\lambda_{\text{em}}$<br>(nm) | $\lambda_{\text{abs}} - \lambda_{\text{em}}$ (nm);<br>( $\text{cm}^{-1}$ ) | Quantum<br>yields (%) | Life time<br>(ns) | Radiative<br>decay<br>constant<br>( $10^8/\text{s}$ ) | Non-radiative<br>decay constant<br>( $10^8/\text{s}$ ) |
|---------------------------------|--------------------------------|-------------------------------|----------------------------------------------------------------------------|-----------------------|-------------------|-------------------------------------------------------|--------------------------------------------------------|
| Hexane                          | 384                            | 455                           | 71; (4063)                                                                 | 66                    | 1.86              | 3.51                                                  | 1.82                                                   |
| Toluene                         | 384                            | 475                           | 91; (4989)                                                                 | 65                    | 1.87              | 3.40                                                  | 1.87                                                   |
| CHCl <sub>3</sub>               | 391                            | 492                           | 101; (5250)                                                                | 63                    | 1.52              | 4.15                                                  | 2.43                                                   |
| EtOAc                           | 384                            | 498                           | 114; (5962)                                                                | 38                    | 1.97              | 1.92                                                  | 3.15                                                   |
| CH <sub>2</sub> Cl <sub>2</sub> | 384                            | 503                           | 119; (6161)                                                                | 15                    | 2.47              | 0.61                                                  | 3.34                                                   |
| CH <sub>3</sub> CN              | 391                            | 507                           | 116; (6299)                                                                | 13                    | 2.51              | 0.51                                                  | 3.47                                                   |
| MeOH                            | 384                            | 510                           | 126; (6351)                                                                | 3                     | 1.86              | 0.16                                                  | 4.21                                                   |
| DMF                             | 390                            | 517                           | 127; (6435)                                                                | 2                     | 2.57              | 0.078                                                 | 3.81                                                   |

**Table S4:** Optical data of **1** in different solvents

| Solvents                        | $\lambda_{\text{abs}}$ | $\lambda_{\text{em}}$ | $\lambda_{\text{abs}} - \lambda_{\text{em}}$ (nm);<br>( $\text{cm}^{-1}$ ) | Quantum<br>yields (%) | Life time<br>(ns) | Radiative<br>decay constant<br>( $10^8/\text{s}$ ) | Non-radiative<br>decay constant<br>( $10^8/\text{s}$ ) |
|---------------------------------|------------------------|-----------------------|----------------------------------------------------------------------------|-----------------------|-------------------|----------------------------------------------------|--------------------------------------------------------|
| Hexane                          | 368                    | 417                   | 49; (3196)                                                                 | 74                    | 1.28              | 5.78                                               | 2.03                                                   |
| Toluene                         | 376                    | 423                   | 47; (2955)                                                                 | 75                    | 1.39              | 5.39                                               | 1.79                                                   |
| CHCl <sub>3</sub>               | 372                    | 437                   | 65; (3998)                                                                 | 73                    | 1.38              | 5.29                                               | 1.96                                                   |
| EtOAc                           | 372                    | 443                   | 71; (4308)                                                                 | 72                    | 1.39              | 5.18                                               | 2.03                                                   |
| CH <sub>2</sub> Cl <sub>2</sub> | 372                    | 448                   | 76; (4560)                                                                 | 73                    | 1.52              | 4.85                                               | 1.78                                                   |
| CH <sub>3</sub> CN              | 378                    | 457                   | 79; (4574)                                                                 | 73                    | 1.81              | 4.03                                               | 1.49                                                   |
| MeOH                            | 374                    | 467                   | 93; (5314)                                                                 | 72                    | 1.31              | 5.49                                               | 2.14                                                   |
| DMF                             | 378                    | 473                   | 99; (5324)                                                                 | 71                    | 1.79              | 3.97                                               | 1.62                                                   |

**Table S5:** Optical data of **2** in different solvents

| Solvents                 | $\lambda_{\text{abs}}$ | $\lambda_{\text{em}}$ | $\lambda_{\text{abs}} - \lambda_{\text{em}}$ (nm);<br>( $\text{cm}^{-1}$ ) | Quantum<br>yields (%) | Life time<br>(ns) | Radiative<br>decay constant<br>( $10^8/\text{s}$ ) | Non-radiative<br>decay constant<br>( $10^8/\text{s}$ ) |
|--------------------------|------------------------|-----------------------|----------------------------------------------------------------------------|-----------------------|-------------------|----------------------------------------------------|--------------------------------------------------------|
| Hexane                   | 374                    | 431                   | 57; (3536)                                                                 | 71                    | 1.26              | 5.63                                               | 2.34                                                   |
| Toluene                  | 372                    | 438                   | 66; (4050)                                                                 | 70                    | 1.38              | 5.07                                               | 2.17                                                   |
| $\text{CHCl}_3$          | 375                    | 444                   | 69; (4144)                                                                 | 70                    | 1.45              | 4.84                                               | 2.06                                                   |
| EtOAc                    | 377                    | 457                   | 80; (4644)                                                                 | 69                    | 1.57              | 4.40                                               | 2.04                                                   |
| $\text{CH}_2\text{Cl}_2$ | 376                    | 462                   | 86; (4950)                                                                 | 70                    | 1.73              | 4.04                                               | 1.73                                                   |
| $\text{CH}_3\text{CN}$   | 378                    | 470                   | 92; (5179)                                                                 | 69                    | 1.26              | 5.48                                               | 2.46                                                   |
| MeOH                     | 378                    | 478                   | 100; (5553)                                                                | 67                    | 2.06              | 3.25                                               | 1.60                                                   |
| DMF                      | 374                    | 480                   | 106; (5904)                                                                | 67                    | 2.01              | 3.33                                               | 1.65                                                   |

### Anion Binding studies in Acetonitrile

Acetonitrile solutions of **1** and **2** ( $1 \times 10^{-5}$  M) were titrated independently against incremental addition of solution of TBAF.

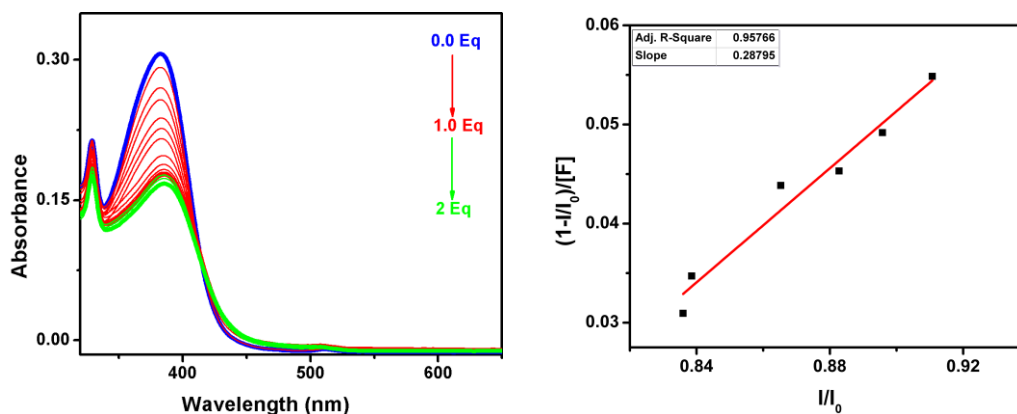

**Figure S32:** Left: changes associated with UV-Vis spectrum of **1** (acetonitrile, 10  $\mu\text{M}$ ) in the presence of fluoride ions (TBAF,  $1.5 \times 10^{-3}$  M) ( $\lambda_{\text{ex}}$  at 375 nm); right: plot of  $I/I_0$  Vs  $(1-I/I_0)/[F^-]$  ( $\lambda_{\text{abs}}$  at 385 nm). Calculated binding constant  $K = 2.8 \times 10^5 \text{ M}^{-1}$

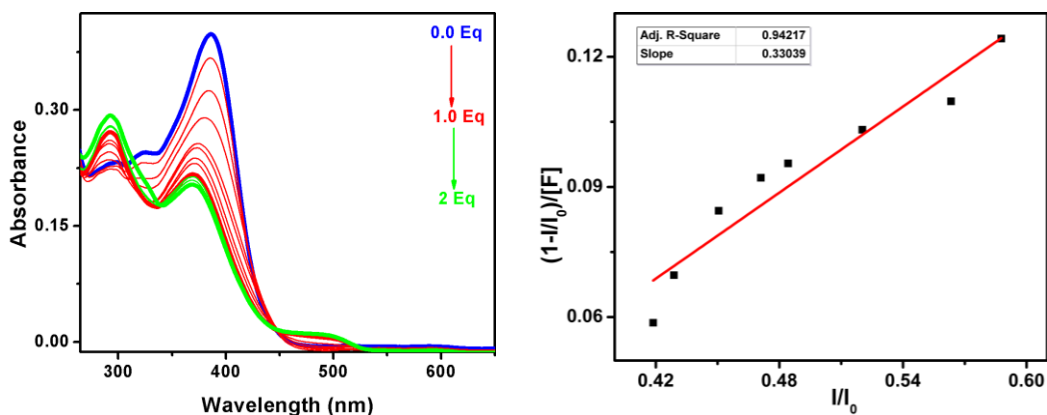

**Figure S33:** Left: changes associated with UV-Vis spectrum of **2** (10  $\mu\text{M}$  in water (1%  $\text{CH}_3\text{CN}$  was added to enhance the solubility) in the presence of fluoride ions ( $1.5 \times 10^{-3}$  M) (KF dissolved in HEPES buffer and pH maintains 7.0) ( $\lambda_{\text{ex}}$  at 375 nm); right: plot of  $I/I_0$  Vs  $(1-I/I_0)/[\text{F}^-]$  ( $\lambda_{\text{abs}}$  at 385 nm). Calculated binding constant  $K = 3.3 \times 10^5 \text{ M}^{-1}$ .

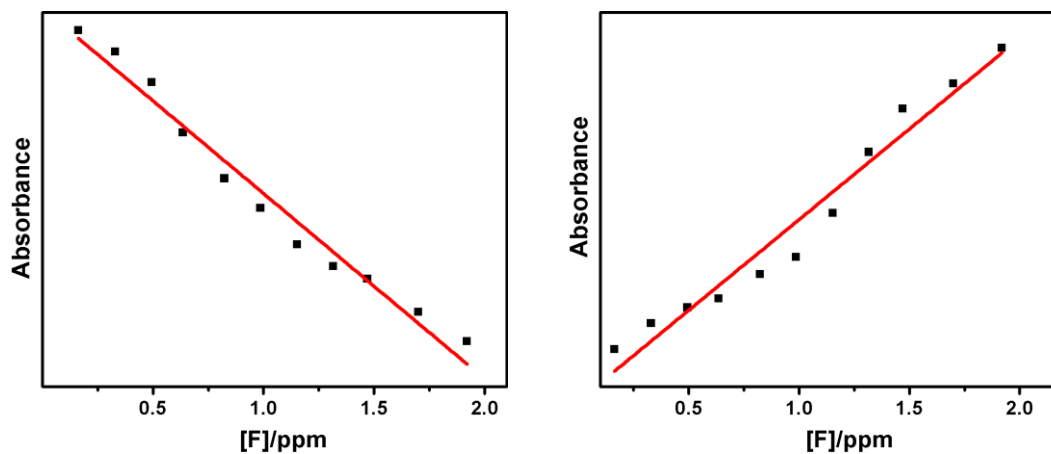

**Figure S34:** Linear plots between the changes in absorbance of **2** at 385 nm (left) and 485 nm (right) vs concentration of fluoride (in ppm) in  $\text{CH}_3\text{CN}$  solvent.

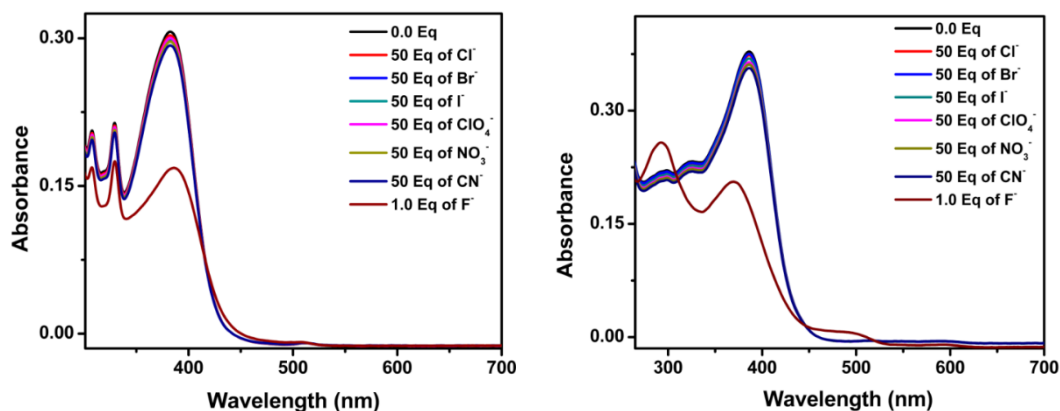

**Figure S35:** Changes associated with UV-Visible spectra of **1** (left) and **2** (right) in presence of various anions ( $\text{CH}_3\text{CN}$ , 10  $\mu\text{M}$ )

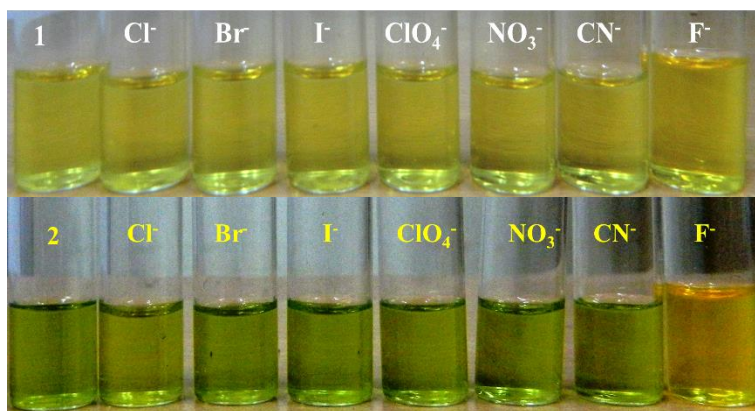

**Figure S36:** Photograph demonstrating the color changes of **1** (above) and **2** (down) associated with the addition of different anions under ambient light. Concentration: 10  $\mu$ M in acetonitrile; Fluoride was added in 1 equiv amount and other anions were used in greater than 50 equiv amount.

### Fluorescence titrations study in organic medium (CH<sub>3</sub>CN)

Fluorescence titration studies were carried by placing 2 mL of compounds **1** and **2** were in  $1 \times 10^{-5}$  M stock solution in CH<sub>3</sub>CN. A septum screw capped quartz cuvette of 1 cm width and followed by gradual incremental addition of  $1 \times 10^{-3}$  M CH<sub>3</sub>CN solution of anions. The experiment was repeated for at least three times at 298 K to obtain concordant value. Compounds **1** or **2** were excited at 375 nm and the emissions were monitored in the range of 400-700 nm (2 nm slit width kept constant for both source and detector).

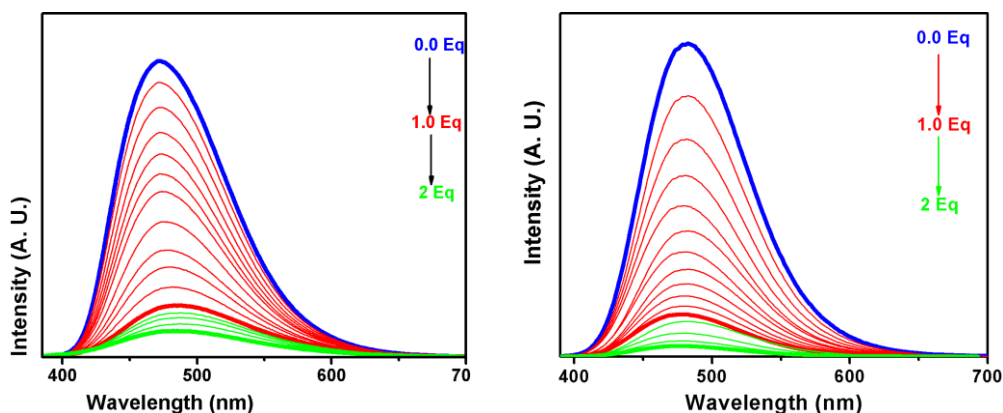

**Figure S37:** Changes associated with PL spectra of **1** (left) and **2** (right) in the presence of fluoride ions (TBAF,  $1.5 \times 10^{-3}$  M, acetonitrile) ( $\lambda_{\text{ex}}$  at 375 nm)

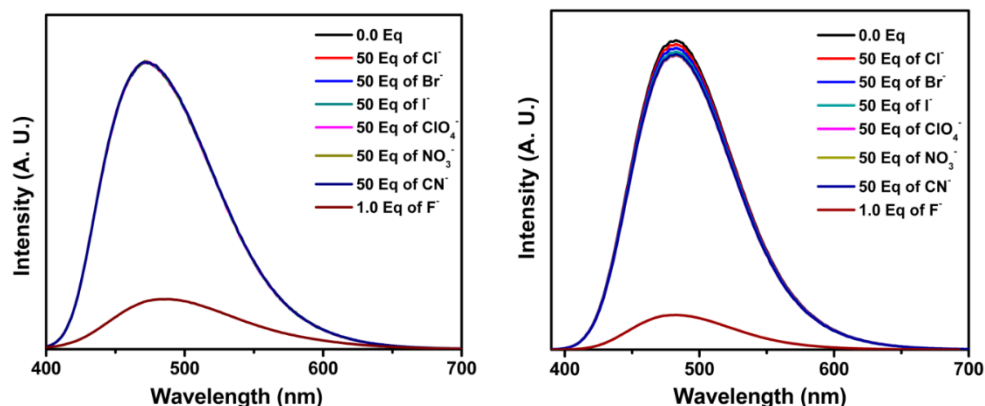

**Figure S38:** Changes associated with PL spectra of **1** (left) and **2** (right) in presence of various anions ( $\text{CH}_3\text{CN}$ ,  $10 \mu\text{M}$ ) ( $\lambda_{\text{exc}}$  at  $375 \text{ nm}$ ).

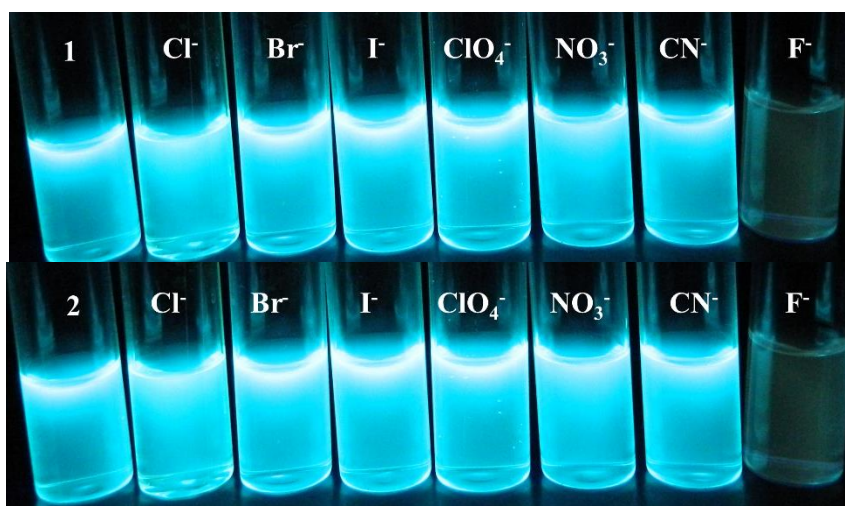

**Figure S39:** Photograph demonstrating the emission color changes associated with **1** (above) and **2** (down) with different anions under UV-light. Solution concentration was  $10 \mu\text{M}$  in acetonitrile solvent. Fluoride was added in 1equiv amount and other anions were used in greater than 50equiv amount.

#### UV-visible titration studies in $\text{CH}_3\text{CN}:\text{H}_2\text{O}$ (1:1)

Respective Lewis acid (**1/2**) ( $1 \times 10^{-5} \text{ M}$ ) was dissolved in  $\text{CH}_3\text{CN}:\text{H}_2\text{O}$  in 1:1 ratio. The pH of solution was maintained at pH 7.0 using HEPES buffer (6 mM). Aqueous solutions of potassium fluoride used as a fluoride source.

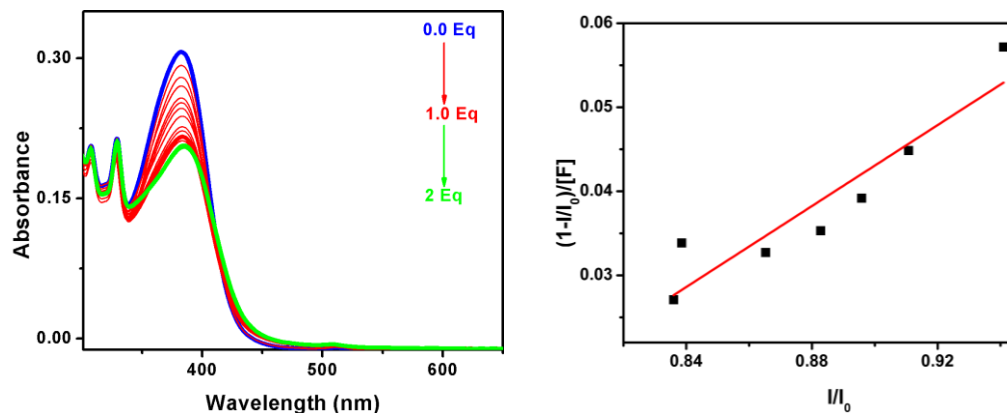

**Figure S40:** Left: Changes associated with UV-Vis absorption spectrum of **1** (1:1 ratio of CH<sub>3</sub>CN/H<sub>2</sub>O mixture 10 μM) in presence of fluoride ions (KF, 1 × 10<sup>-3</sup> M). right: plot of I/I<sub>0</sub> Vs (1-I/I<sub>0</sub>)/[F<sup>-</sup>] (λ<sub>abs</sub> at 385 nm). Calculated binding constant K = 2.4 × 10<sup>5</sup> M<sup>-1</sup>

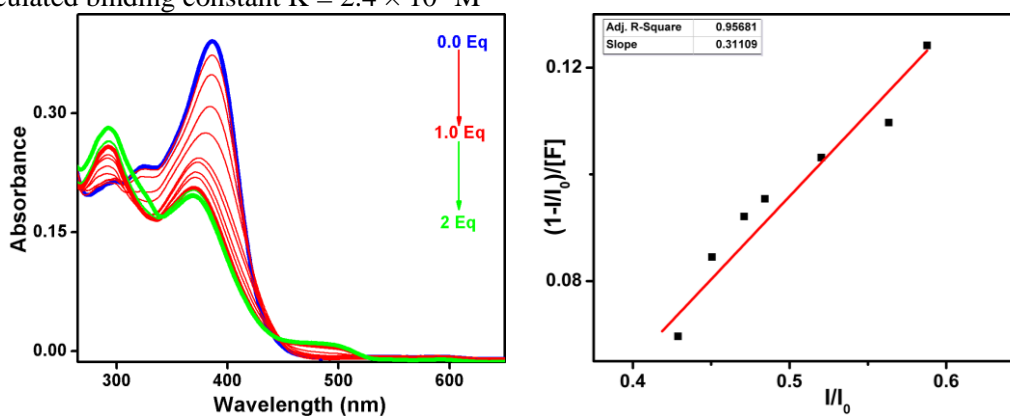

**Figure S41:** Left: Changes associated with UV-Vis absorption spectrum of **2** (1:1 ratio of CH<sub>3</sub>CN/H<sub>2</sub>O mixture 10 μM) in presence of fluoride ions (KF, 1 × 10<sup>-3</sup> M). right: plot of I/I<sub>0</sub> Vs (1-I/I<sub>0</sub>)/[F<sup>-</sup>] (λ<sub>abs</sub> at 385 nm). Calculated binding constant K = 3.1 × 10<sup>5</sup> M<sup>-1</sup>

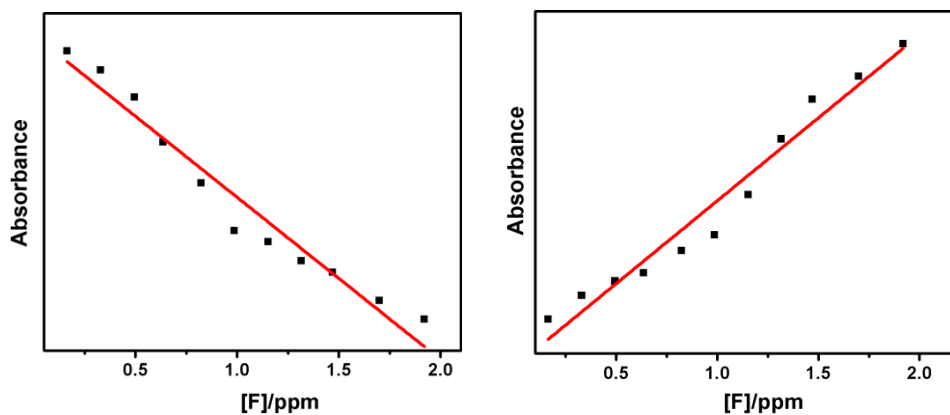

**Figure S42:** Linear plot between the changes in absorbance of **2** at 385 nm (left) and 485 nm (right) vs concentration of fluoride (ppm) in 1:1 mixture of CH<sub>3</sub>CN and H<sub>2</sub>O.

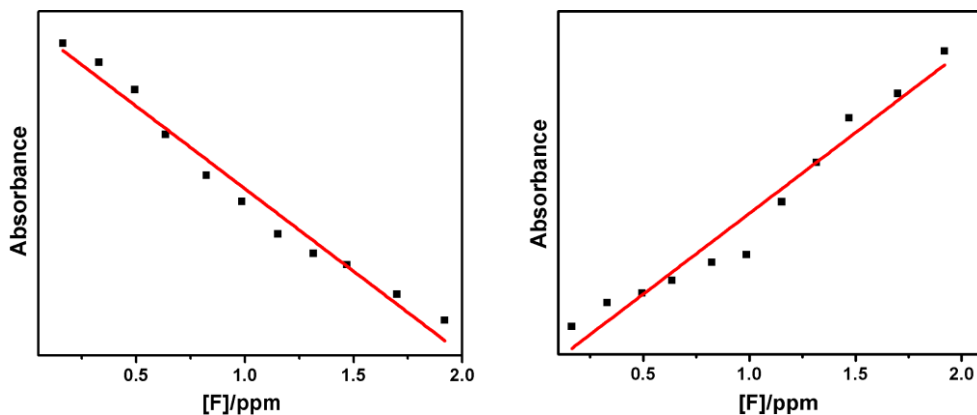

**Figure S43:** Linear plot between the changes in absorbance of **2** at 385 nm (left) and 485 nm (right) vs concentration of fluoride in water (1% CH<sub>3</sub>CN was added to enhance the solubility).

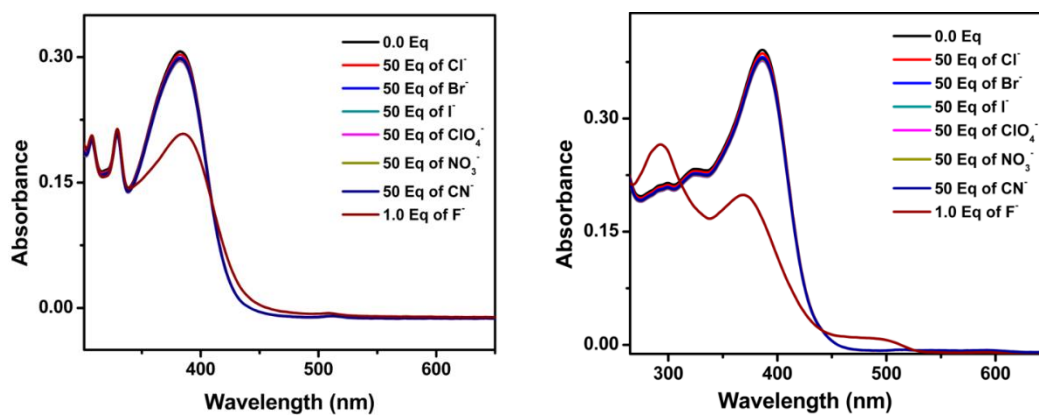

**Figure S44:** UV-Visible absorbance spectra of **1** (left) and **2** (right) in presence of various anions (in 1:1 mixture of CH<sub>3</sub>CN and H<sub>2</sub>O)

### **Fluorescence titration studies in CH<sub>3</sub>CN: H<sub>2</sub>O (1:1)**

Respective Lewis acid (**1/2**) ( $1 \times 10^{-5}$  M) was dissolved in CH<sub>3</sub>CN:H<sub>2</sub>O mixture in the ratio 1:1. The pH of solution was maintained at pH 7.0 using HEPES buffer. Aqueous solutions of potassium fluoride used as a fluoride source ( $1 \times 10^{-3}$  M in HEPES buffer, pH = 7). The experiment was repeated for at least three times at 298 K to obtain concordant value. Compounds **1** or **2** were excited at 375 nm and the emissions were monitored in the range of 400-700 nm (2 nm slit width kept constant for both source and detector).



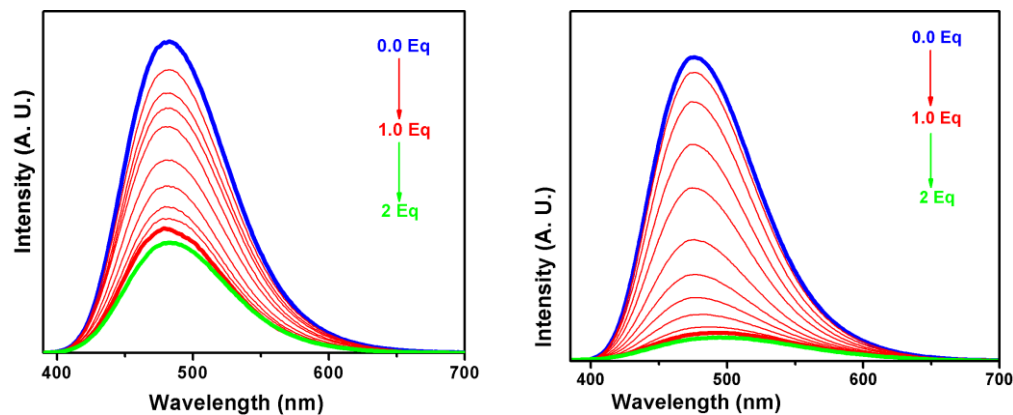

**Figure S45:** Changes associated with PL spectrum of **1** (left) and **2** (right) (1:1 ratio of CH<sub>3</sub>CN/H<sub>2</sub>O mixture, 10 μM) in the presence of fluoride ions (KF, 1 × 10<sup>-3</sup> M,) (λ<sub>ex</sub> at 375 nm)

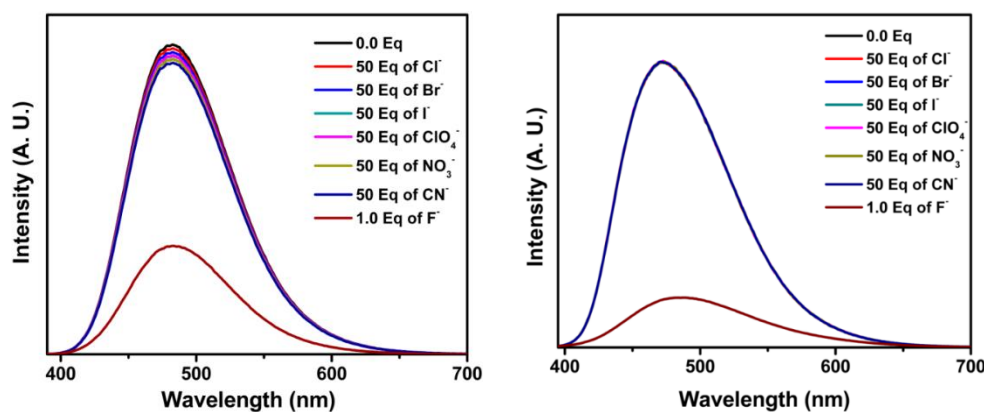

**Figure S46:** Changes associated with PL spectra of **1** (left) and **2** (right) in presence of various anions (1:1 ratios of H<sub>2</sub>O and CH<sub>3</sub>CN, 10 μM)(λ<sub>ex</sub> at 375 nm).

### UV-visible titration studies in water

Respective Lewis acid (**1/2**) (1 × 10<sup>-5</sup> M) were dissolved in water (1% of CH<sub>3</sub>CN was added to enhance the solubility). The pH of solution was maintained at pH 7.0 using HEPES buffer. Aqueous solutions of potassium fluoride used as a fluoride source

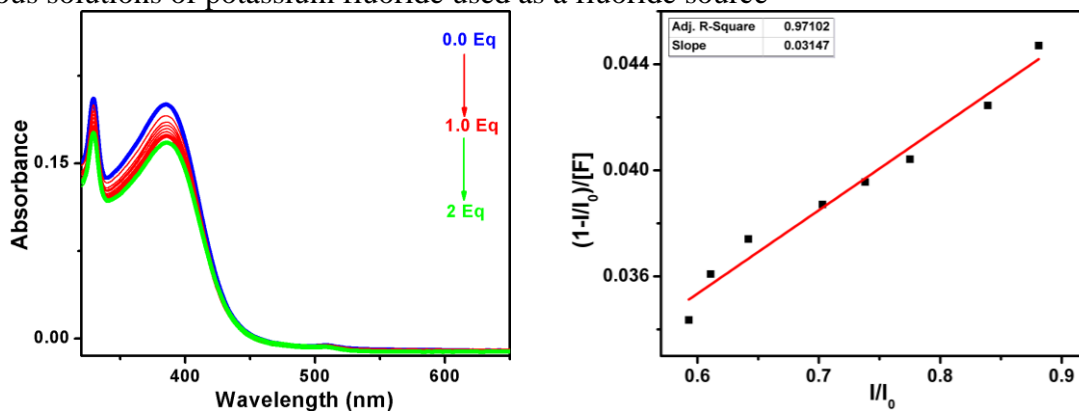

**Figure S47:** Left: Changes associated with UV-Vis absorption spectrum of **1** (aqueous solution (1% of CH<sub>3</sub>CN was added to enhance the solubility), 10 μM) in presence of fluoride ions (KF, 1.5 × 10<sup>-3</sup> M). right: plot of  $I/I_0$  Vs  $(1-I/I_0)/[F^-]$  (λ<sub>abs</sub> at 385 nm). Calculated binding constant  $K = 3.0 \times 10^4 \text{ M}^{-1}$

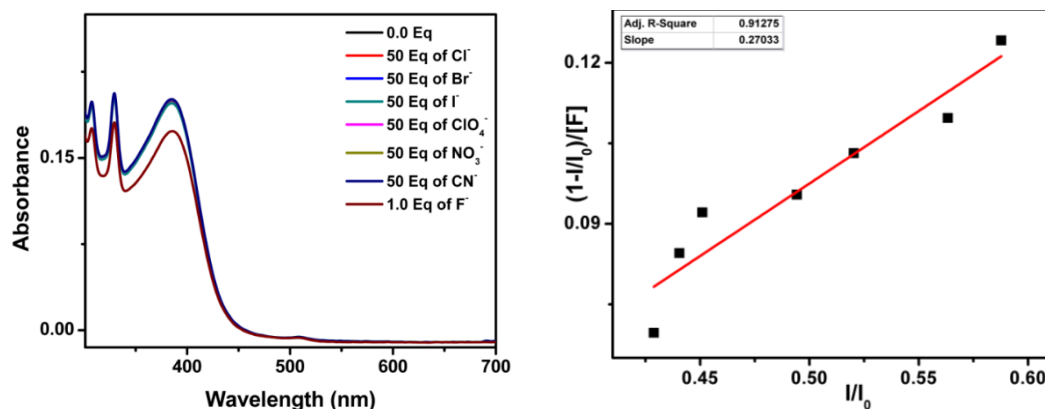

**Figure S48:** Left: Changes associated with UV-Vis absorption spectrum of **1** (aqueous solution (1% of CH<sub>3</sub>CN was added to enhance the solubility), 10 μM) in presence of various anions. right: plot of  $I/I_0$  Vs  $(1-I/I_0)/[F^-]$  ( $\lambda_{\text{abs}}$  at 385 nm) for compound **2**. Calculated binding constant  $K = 2.7 \times 10^3 \text{ M}^{-1}$  for **2**.

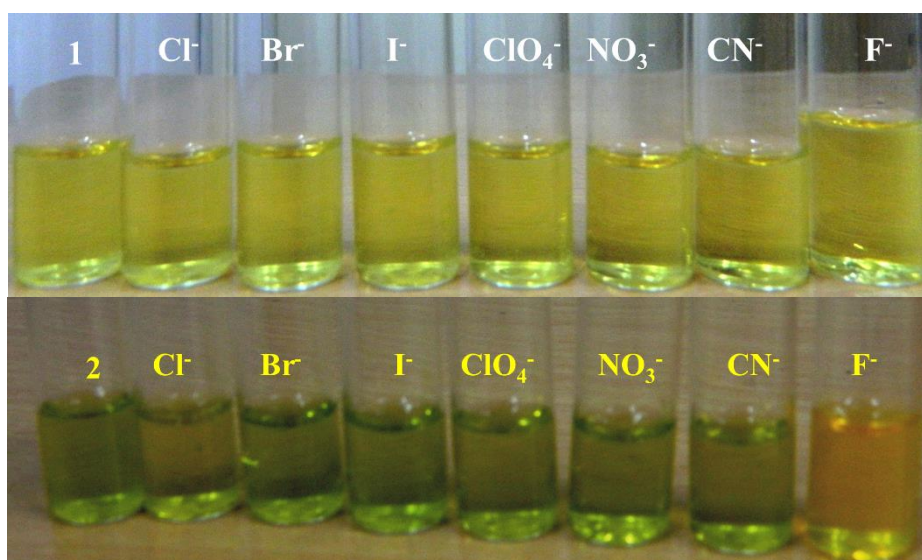

**Figure S49:** Photograph demonstrating the color changes of **1** (above) and **2** (down) associated with the addition of different anions under normal light. 10 μM solutions were prepared by dissolving respective compounds aqueous solution (1% of CH<sub>3</sub>CN); Fluoride was added in 1 equiv amount and other anions were used in greater than 50 equiv amount.

### Fluorescence titration studies in water

Respective Lewis acid (**1/2**) ( $1 \times 10^{-5} \text{ M}$ ) was dissolved in water (1% of CH<sub>3</sub>CN was added to enhance the solubility). The pH of solution was maintained at pH 7.0 using HEPES (6 mM) buffer. Aqueous solutions of potassium fluoride used as a fluoride source ( $1 \times 10^{-3} \text{ M}$  in HEPES buffer, pH = 7). The experiment was repeated for at least three times at 298 K to obtain concordant value. Compounds **1** or **2** were excited at 375 nm and the emissions were monitored in the range of 400-700 nm (2 nm slit width kept constant for both source and detector)

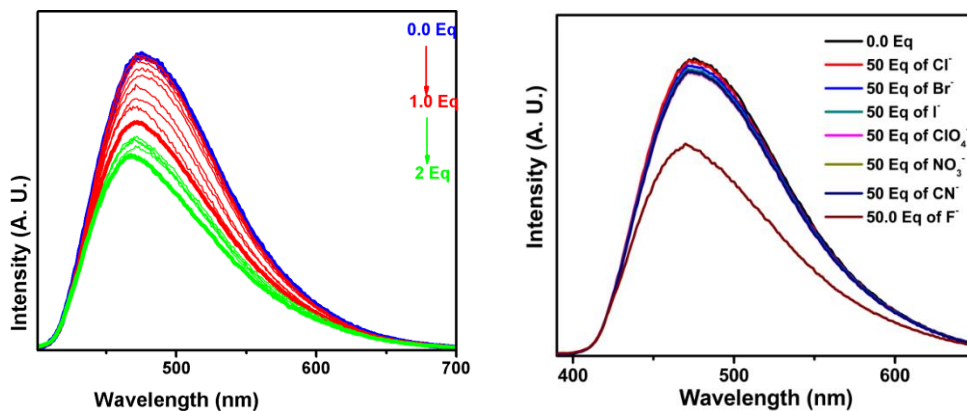

**Figure S50:** Changes associated with PL spectra of **1** (aqueous solution (1% of CH<sub>3</sub>CN was added to enhance the solubility), 10 μM) in the presence of fluoride ions (KF, 1.5 × 10<sup>-3</sup> M) (λ<sub>ex</sub> at 375 nm) (left). Changes associated with PL spectra of **1** (right) in presence of various anions (λ<sub>ex</sub> at 375 nm) (right).

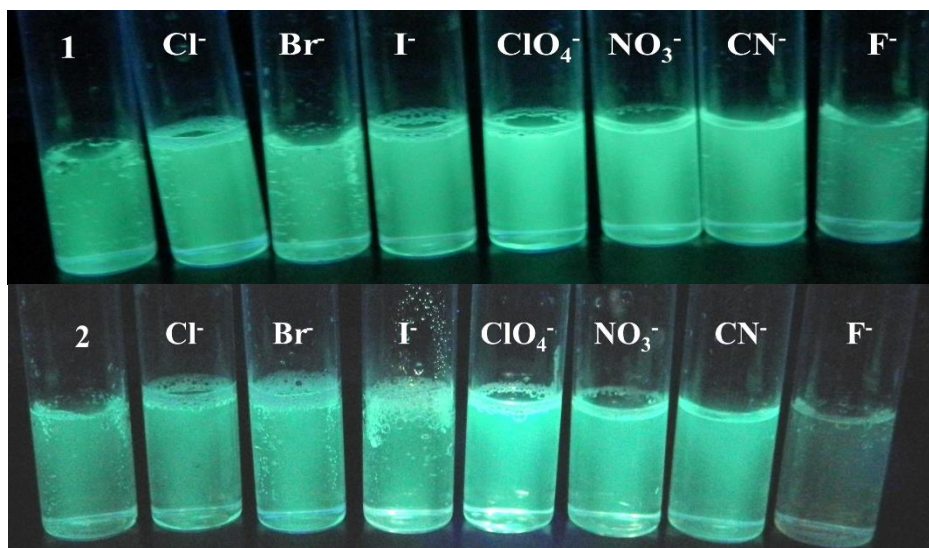

**Figure S51:** Photograph demonstrating the emission changes associated with **1** (above) and **2** (down) in presence of different anions under UV-light. Concentrations of solutions were 10 μM in aqueous solution (1% of CH<sub>3</sub>CN was added to enhance the solubility). Fluoride was added in 1 equiv amount and other anions were used in greater than 50 equiv amount.

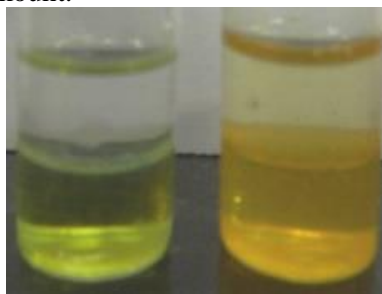

**Figure S52:** Demonstration of extraction of aqueous inorganic fluoride. Left side vial (before shaking): bottom green layer is the DCM solution of compound **2**, colorless top layer is the aqueous KF. Right side vial (after shaking): Visible colour change for the DCM layer from green to yellow clearly indicates that fluoride ions are extracted from aqueous layer.

### Determination of Binding Constant<sup>2</sup>

Solution of (Solvent, Acetonitrile or 1:1 Acetonitrile and water (1% CH<sub>3</sub>CN was added to enhance the solubility) compounds **1** or **2** (2 mL, 1 × 10<sup>-5</sup> M) were placed in a septa screw capped quartz cuvette and was titrated against incremental amount of fluoride ions. The change in absorbance of the band at 395 nm with respect to fluoride concentration was used for calculations.

**Sensor** + F<sup>-</sup> ↔ F• **sensor**; here sensor is compound **1** or **2**

$$I = K_s[\text{sensor}] + K_p[\text{F} \cdot \text{sensor}]$$

$$I_0 = K_s[\text{sensor}]_0$$

$$[\text{sensor}]_0 = [\text{sensor}] + [\text{F} \cdot \text{sensor}]$$

$$K = [\text{F} \cdot \text{sensor}] / [\text{sensor}][\text{F}]$$

$$I/I_0 = (1 + (K_p/K_s)K[\text{F}]) / (1 + K[\text{F}]) (1 - I/I_0) / [\text{F}] \rightarrow K(I/I_0) - K(K_p/K_s)I/I_0 = 1 + K (1 - I/I_0) / [\text{F}]$$

Here, I<sub>0</sub> is initial absorbance of respective band (395 nm), I is absorbance of respective band upon addition of 1.0 equiv of Fluoride. The association constant was obtained from the slope of (1 - I/I<sub>0</sub>)/[F]<sup>-1</sup> Vs I/I<sub>0</sub>.

### Determination of quenching efficiency

Solution of (Acetonitrile or 1:1 ratios of CH<sub>3</sub>CN and H<sub>2</sub>O or in water (1% CH<sub>3</sub>CN was added to enhance the solubility)) compounds **1** or **2** (2 mL, 1 × 10<sup>-5</sup> M) were placed in a septa screw capped quartz cuvette and was titrated against incremental amount of fluoride ions and monitored change in fluorescence band at ~495 nm. Fluorescence quenching efficiency for **1** and **2** were calculated by the following equation.

$$\eta = (I_0 - I) / I_0 \times 100\%$$

Where, I<sub>0</sub> is the initial PL intensity of the sensors (**1** or **2**) and I is the intensity after addition of 1 equivalent of fluoride.

**Table S6:** The quenching efficiency of **1** and **2**

| Compounds | Quenching efficiency (%) |                                           |       |
|-----------|--------------------------|-------------------------------------------|-------|
|           | CH <sub>3</sub> CN       | 1:1 (H <sub>2</sub> O:CH <sub>3</sub> CN) | Water |
| <b>1</b>  | 89                       | 60                                        | 23    |
| <b>2</b>  | 96                       | 92                                        | 83    |

### Calculation of Limit of Detection (LoD)

The limit of detection of compound **1** and **2** were calculated from the fluorescence quenching titration experiment (compounds **1** or **2** were dissolved in Acetonitrile or 1:1 ratios of CH<sub>3</sub>CN and H<sub>2</sub>O or in water (1% CH<sub>3</sub>CN was added to enhance the solubility)). The intercept to X-axis ( $\log[F^-]$ ) was obtained by linear fitting of the  $(I_{\max}-I)/(I_{\max}-I_{\min})$  vs  $\log[F^-]$ , where  $I_{\max}$ ,  $I$  and  $I_{\min}$  are the initial fluorescence intensity, PL intensity at particular concentration and PL intensity at saturation point respectively. Limit of detection were calculated using the formula,  $([F^-] \times \text{MWPA})/1000$  (multiplied by  $10^9$  to get the values in ppb), where MWPA is the molecular weight of  $F^-$  source. The LoD of **1** and **2** is given in Table S6.

**Table S7:** The LoD and association constants of **1** and **2**

| Compounds | limit of detection (ppm)                               |                                          |       |
|-----------|--------------------------------------------------------|------------------------------------------|-------|
|           | CH <sub>3</sub> CN                                     | 1:1/ H <sub>2</sub> O:CH <sub>3</sub> CN | water |
| <b>1</b>  | 6.2                                                    | 8.1                                      | 87.2  |
| <b>2</b>  | 0.03                                                   | 0.05                                     | 0.1   |
| Compounds | Association constants ( $\times 10^5 \text{ M}^{-1}$ ) |                                          |       |
|           | CH <sub>3</sub> CN                                     | 1:1 / (Water:CH <sub>3</sub> CN)         | Water |
| <b>1</b>  | 2.8                                                    | 2.4                                      | 0.3   |
| <b>2</b>  | 3.3                                                    | 3.1                                      | 2.7   |

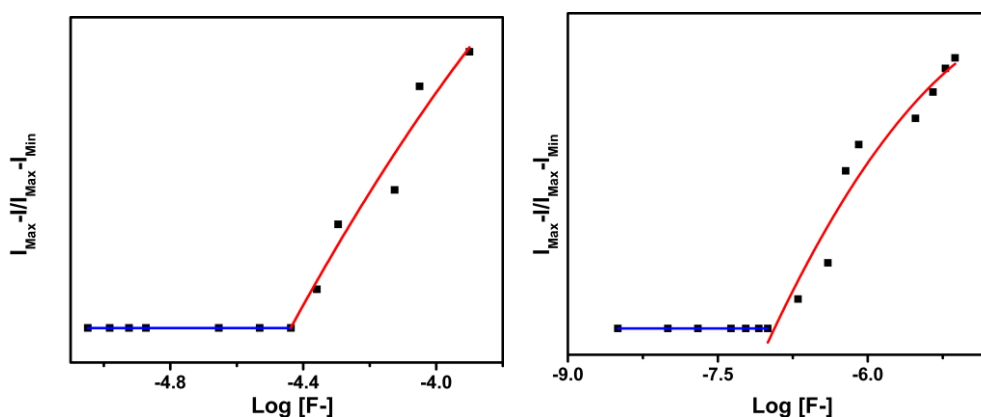

**Figure S53:**  $(I_{\max}-I)/(I_{\max}-I_{\min})$  vs  $\log[F^-]$  plots for PL data obtained for acetonitrile solutions of **1** (left) and **2** (right). For **1** and **2**, the lowest detection limits ( $[F^-]$ ) were found to be 6.2 and 0.03 ppm respectively.

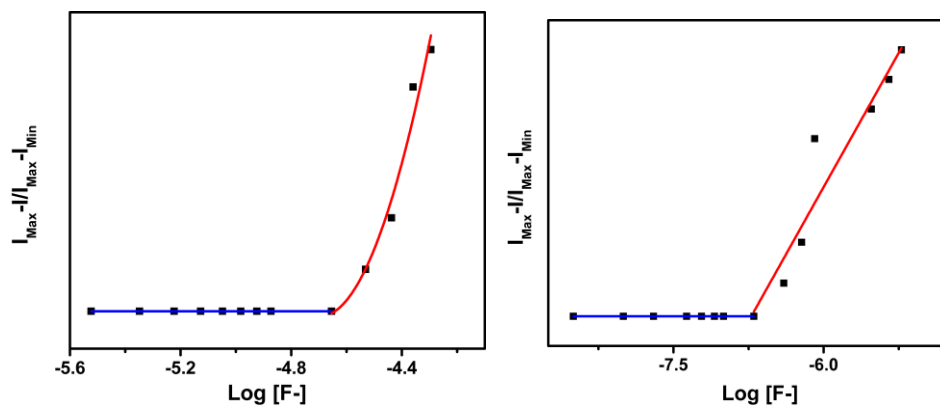

**Figure S54:**  $(I_{\max}-I)/(I_{\max}-I_{\min})$  vs  $\log[F^-]$  plots for PL data obtained for **1** (left) and **2** (right) in 1:1 ratio of  $\text{CH}_3\text{CN}:\text{H}_2\text{O}$ . For **1** and **2**, the lowest detection limits ( $[F^-]$ ) were found to be 8.1 and 0.05 ppm respectively.

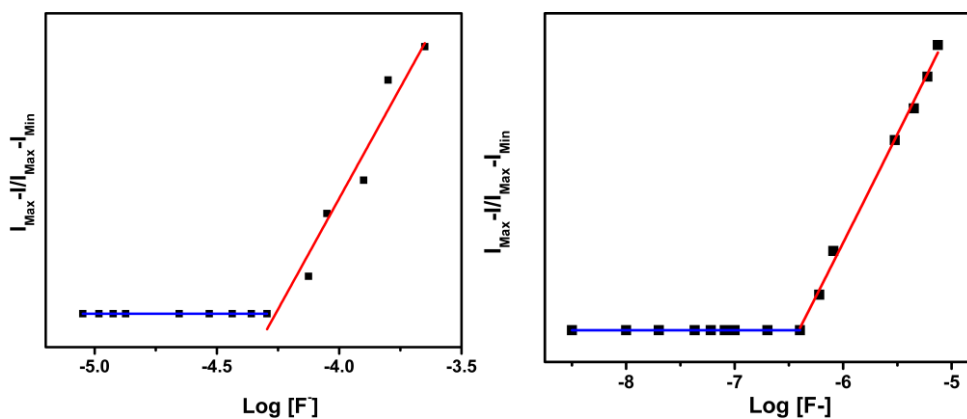

**Figure S55:**  $(I_{\max}-I)/(I_{\max}-I_{\min})$  vs  $\log[F^-]$  plots for PL data obtained for **1** (left) and **2** (right) in aqueous medium. For **1** and **2**, the lowest detection limits ( $[F^-]$ ) were found to be 87.2 and 0.1 ppm respectively.

### Cytotoxicity Study:

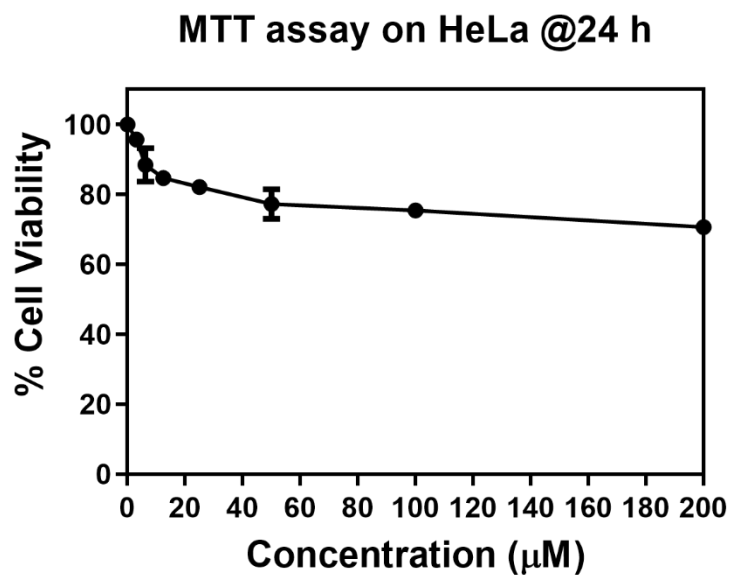

**Figure S56a:** Cell viability of HeLa cells treated with different concentrations of **2** for 24 h.

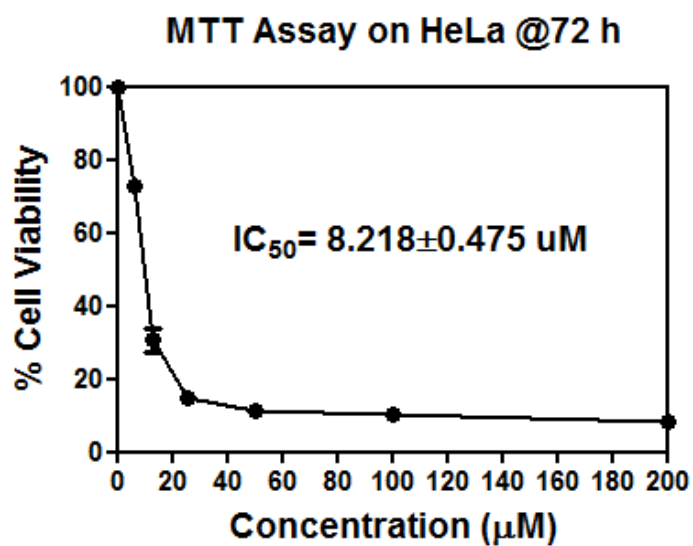

**Figure S56b:** Cell viability of HeLa cells treated with different concentrations of **2** for 72 h.

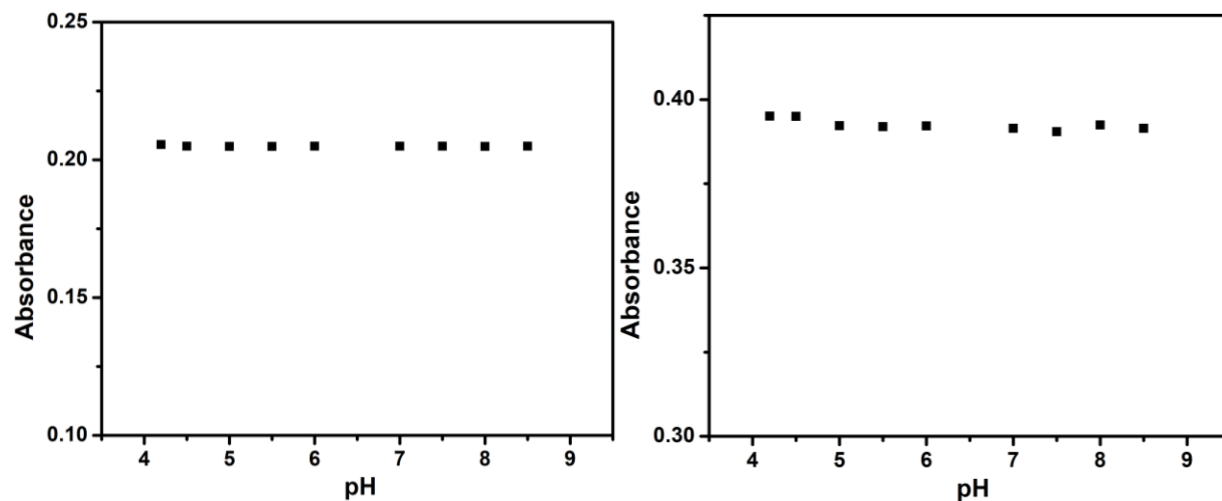

**Figure 57:** The absorption spectra of compounds **1** and **2** with various pHs.

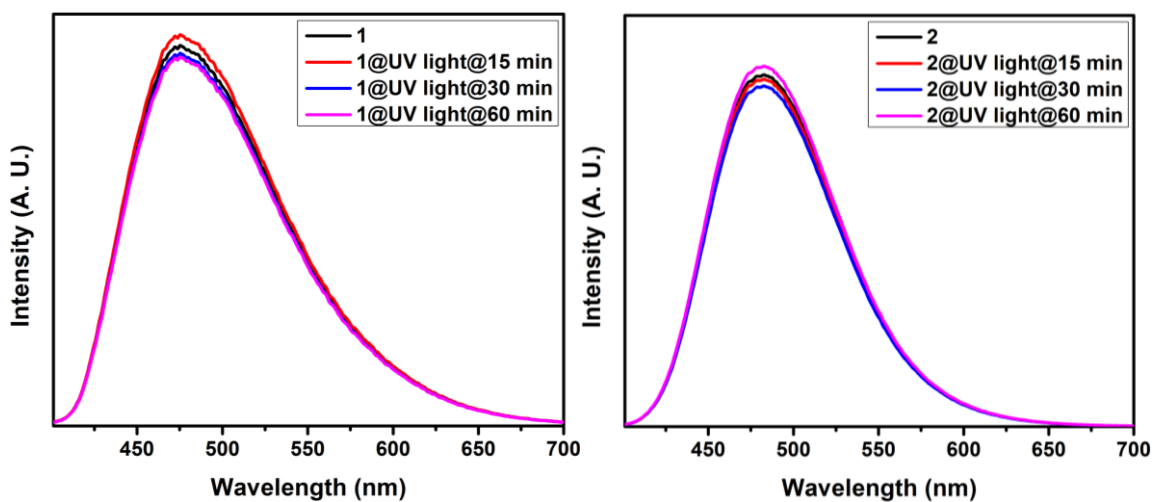

**Figure 58:** The fluorescence spectra of compounds **1** and **2** under exposure to UV light conditions with varying time period.

**DFT calculations:**<sup>3</sup>



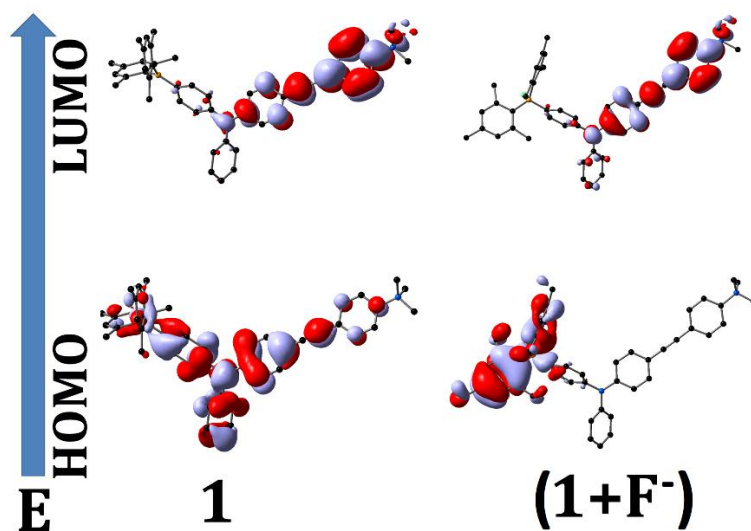

**Figure S59:** HOMO and LUMO of **1** (left) and **(1+F<sup>-</sup>)** (right) plotted with a 0.02 iso-contour value.

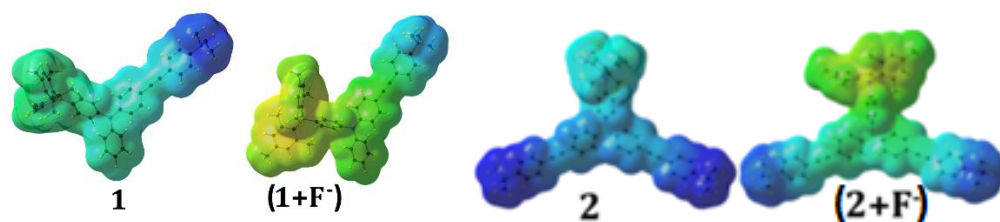

**Figure S60:** ESP surfaces of **1** and **(1+F<sup>-</sup>)** and **2** and **(2+F<sup>-</sup>)** (iso value = 0.0004, range =  $\pm 0.15$ ).

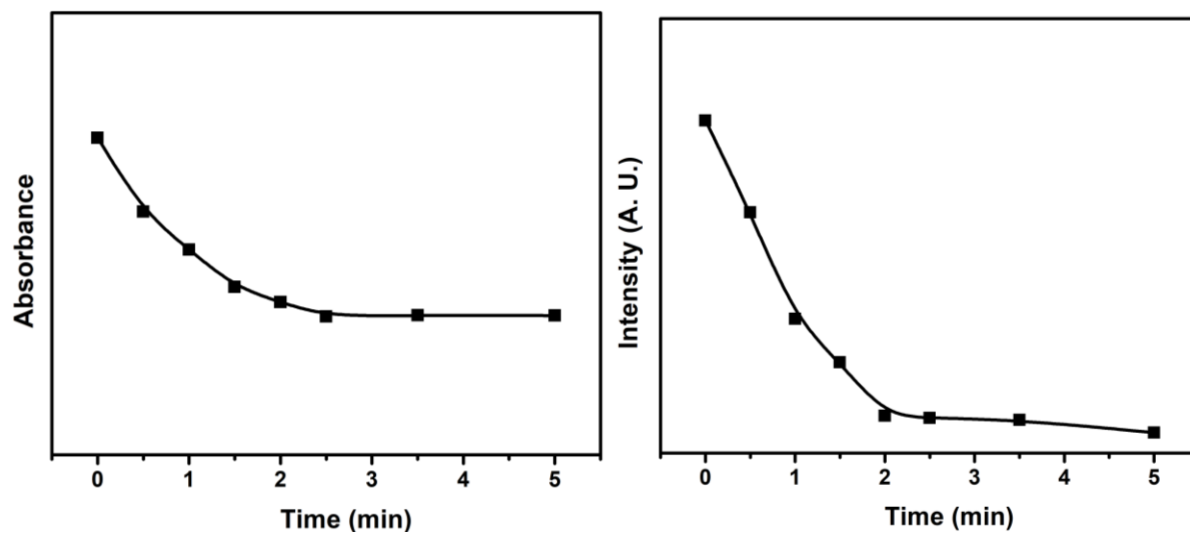

**Figure S61:** Change of Absorption (left) and fluorescence (right) with time upon addition of 1 eq of fluoride ions to receptor **1**

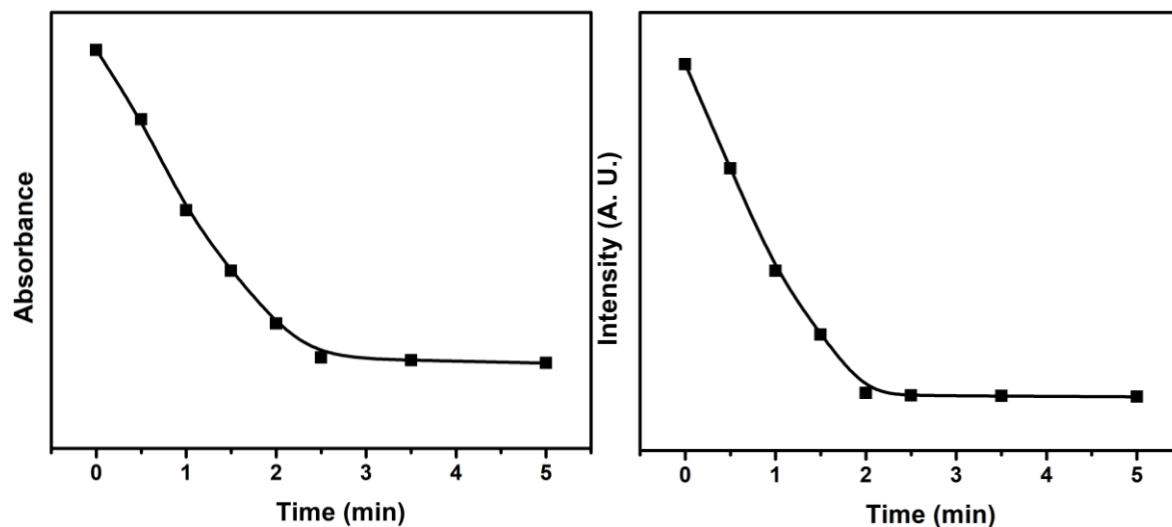

**Figure S62:** Change of Absorption (left) and fluorescence (right) with time upon addition of 1 eq of fluoride ions to receptor **2**

**Table S8:** Coordinates of **BTPA-NMe<sub>2</sub>**

| Center Number | Atomic Number | Atomic Type | Coordinates (Angstroms) |           |           |
|---------------|---------------|-------------|-------------------------|-----------|-----------|
|               |               |             | X                       | Y         | Z         |
| 1             | 6             | 0           | -0.270759               | 6.662450  | -1.376822 |
| 2             | 6             | 0           | -1.023091               | 5.711688  | -2.070022 |
| 3             | 6             | 0           | 0.623696                | 6.241262  | -0.390554 |
| 4             | 6             | 0           | -0.880024               | 4.354169  | -1.789046 |
| 5             | 1             | 0           | -1.716560               | 6.024871  | -2.846028 |
| 6             | 6             | 0           | 0.760494                | 4.886958  | -0.090805 |
| 7             | 1             | 0           | 1.211550                | 6.970776  | 0.160229  |
| 8             | 6             | 0           | 0.009791                | 3.930108  | -0.790191 |
| 9             | 1             | 0           | -1.454994               | 3.616055  | -2.339324 |
| 10            | 1             | 0           | 1.447926                | 4.562586  | 0.684138  |
| 11            | 6             | 0           | -0.969186               | 1.712211  | -0.355277 |
| 12            | 6             | 0           | -0.929238               | 0.363097  | -0.759458 |
| 13            | 6             | 0           | -2.165707               | 2.212217  | 0.194746  |
| 14            | 6             | 0           | -2.052717               | -0.441118 | -0.625895 |
| 15            | 1             | 0           | -0.017805               | -0.039748 | -1.188875 |
| 16            | 6             | 0           | -3.271790               | 1.385141  | 0.335497  |
| 17            | 1             | 0           | -2.212546               | 3.245946  | 0.521330  |
| 18            | 6             | 0           | -3.265179               | 0.032317  | -0.074518 |
| 19            | 1             | 0           | -1.995928               | -1.473244 | -0.962395 |
| 20            | 1             | 0           | -4.173360               | 1.794454  | 0.783634  |
| 21            | 5             | 0           | -4.520526               | -0.885758 | 0.073352  |
| 22            | 6             | 0           | -4.624524               | -2.198552 | -0.815589 |
| 23            | 6             | 0           | -5.659691               | -0.471407 | 1.101368  |
| 24            | 6             | 0           | -4.770669               | -3.479762 | -0.216699 |
| 25            | 6             | 0           | -4.558291               | -2.138212 | -2.232661 |
| 26            | 6             | 0           | -5.386848               | -0.305029 | 2.482840  |
| 27            | 6             | 0           | -6.990516               | -0.218683 | 0.659257  |
| 28            | 6             | 0           | -4.832466               | -4.627580 | -1.011130 |
| 29            | 6             | 0           | -4.828598               | -3.657276 | 1.287336  |
| 30            | 6             | 0           | -4.652827               | -3.309675 | -2.994251 |
| 31            | 6             | 0           | -4.397440               | -0.833904 | -2.994142 |
| 32            | 6             | 0           | -6.401741               | 0.099316  | 3.362824  |
| 33            | 6             | 0           | -4.038953               | -0.617916 | 3.106156  |
| 34            | 6             | 0           | -7.968322               | 0.194239  | 1.564833  |

|    |   |   |           |           |           |
|----|---|---|-----------|-----------|-----------|
| 35 | 6 | 0 | -7.386924 | -0.342228 | -0.798157 |
| 36 | 6 | 0 | -4.784882 | -4.567352 | -2.406416 |
| 37 | 1 | 0 | -4.927016 | -5.597792 | -0.525908 |
| 38 | 1 | 0 | -5.686534 | -3.136448 | 1.724517  |
| 39 | 1 | 0 | -4.907976 | -4.717258 | 1.549715  |
| 40 | 1 | 0 | -3.930998 | -3.265383 | 1.780553  |
| 41 | 1 | 0 | -4.619368 | -3.233578 | -4.080204 |
| 42 | 1 | 0 | -3.339707 | -0.583820 | -3.142149 |
| 43 | 1 | 0 | -4.856982 | -0.910208 | -3.985838 |
| 44 | 1 | 0 | -4.850769 | 0.017446  | -2.480808 |
| 45 | 6 | 0 | -7.697723 | 0.360367  | 2.928107  |
| 46 | 1 | 0 | -6.164416 | 0.208188  | 4.420426  |
| 47 | 1 | 0 | -4.098263 | -1.532722 | 3.711035  |
| 48 | 1 | 0 | -3.249899 | -0.761241 | 2.367012  |
| 49 | 1 | 0 | -3.721721 | 0.187790  | 3.779145  |
| 50 | 1 | 0 | -8.973630 | 0.393880  | 1.196513  |
| 51 | 1 | 0 | -6.876530 | 0.402303  | -1.422626 |
| 52 | 1 | 0 | -7.141100 | -1.326560 | -1.207592 |
| 53 | 1 | 0 | -8.462986 | -0.182798 | -0.921531 |
| 54 | 6 | 0 | -4.903411 | -5.818105 | -3.245100 |
| 55 | 6 | 0 | -8.778489 | 0.807625  | 3.884003  |
| 56 | 1 | 0 | -5.953797 | -6.110625 | -3.378898 |
| 57 | 1 | 0 | -4.476071 | -5.673970 | -4.243105 |
| 58 | 1 | 0 | -4.391279 | -6.665754 | -2.775926 |
| 59 | 1 | 0 | -9.644043 | 0.133931  | 3.853993  |
| 60 | 1 | 0 | -8.413092 | 0.837120  | 4.915533  |
| 61 | 1 | 0 | -9.146253 | 1.810569  | 3.631736  |
| 62 | 6 | 0 | 1.474990  | 2.010467  | -0.357918 |
| 63 | 6 | 0 | 2.487712  | 2.363014  | -1.264597 |
| 64 | 6 | 0 | 1.786259  | 1.136387  | 0.696797  |
| 65 | 6 | 0 | 3.773152  | 1.857701  | -1.120756 |
| 66 | 1 | 0 | 2.258378  | 3.036362  | -2.084398 |
| 67 | 6 | 0 | 3.067831  | 0.619501  | 0.831886  |
| 68 | 1 | 0 | 1.014597  | 0.865118  | 1.410332  |
| 69 | 6 | 0 | 4.092720  | 0.969938  | -0.072098 |
| 70 | 1 | 0 | 4.545414  | 2.135952  | -1.831257 |
| 71 | 1 | 0 | 3.294695  | -0.054194 | 1.652430  |
| 72 | 7 | 0 | 0.162614  | 2.542668  | -0.498134 |
| 73 | 1 | 0 | -0.379511 | 7.719239  | -1.603451 |
| 74 | 6 | 0 | 5.405975  | 0.444207  | 0.069065  |
| 75 | 6 | 0 | 6.530408  | -0.008677 | 0.188344  |
| 76 | 6 | 0 | 7.841150  | -0.539973 | 0.327306  |
| 77 | 6 | 0 | 8.853384  | -0.250291 | -0.609064 |
| 78 | 6 | 0 | 8.179242  | -1.385022 | 1.402977  |
| 79 | 6 | 0 | 10.132030 | -0.771317 | -0.480823 |
| 80 | 1 | 0 | 8.622703  | 0.392511  | -1.453526 |
| 81 | 6 | 0 | 9.455116  | -1.910456 | 1.540498  |
| 82 | 1 | 0 | 7.419355  | -1.633066 | 2.138197  |
| 83 | 6 | 0 | 10.475430 | -1.612159 | 0.605335  |
| 84 | 1 | 0 | 10.869406 | -0.521340 | -1.234253 |
| 85 | 1 | 0 | 9.657738  | -2.560482 | 2.383285  |
| 86 | 6 | 0 | 12.028245 | -3.105572 | 1.779592  |
| 87 | 1 | 0 | 11.441838 | -4.028502 | 1.647085  |
| 88 | 1 | 0 | 13.087531 | -3.367779 | 1.753842  |
| 89 | 1 | 0 | 11.810037 | -2.706629 | 2.777921  |
| 90 | 6 | 0 | 12.724950 | -1.937710 | -0.318654 |
| 91 | 1 | 0 | 12.404428 | -2.404183 | -1.263495 |
| 92 | 1 | 0 | 12.908985 | -0.873627 | -0.511928 |
| 93 | 1 | 0 | 13.673981 | -2.387409 | -0.021076 |
| 94 | 7 | 0 | 11.757637 | -2.116435 | 0.750487  |

**Table S9:** Coordinates of BTPA-2NMe<sub>2</sub>

| Center<br>Number | Atomic<br>Number | Atomic<br>Type | Coordinates (Angstroms) |   |   |
|------------------|------------------|----------------|-------------------------|---|---|
|                  |                  |                | X                       | Y | Z |

|    |   |   |           |           |           |
|----|---|---|-----------|-----------|-----------|
| 1  | 6 | 0 | -3.578029 | -2.657912 | 0.130003  |
| 2  | 6 | 0 | -3.392999 | -1.527035 | 0.952916  |
| 3  | 6 | 0 | -2.533478 | -3.013084 | -0.749113 |
| 4  | 6 | 0 | -2.217221 | -0.789978 | 0.903319  |
| 5  | 1 | 0 | -4.179917 | -1.242154 | 1.644447  |
| 6  | 6 | 0 | -1.363929 | -2.267154 | -0.809768 |
| 7  | 1 | 0 | -2.657679 | -3.876339 | -1.395579 |
| 8  | 6 | 0 | -1.187859 | -1.144988 | 0.015962  |
| 9  | 1 | 0 | -2.088282 | 0.069268  | 1.553721  |
| 10 | 1 | 0 | -0.576038 | -2.549553 | -1.500830 |
| 11 | 6 | 0 | -0.009656 | 1.017163  | -0.038332 |
| 12 | 6 | 0 | 1.015412  | 1.760522  | 0.579740  |
| 13 | 6 | 0 | -1.064741 | 1.715796  | -0.657411 |
| 14 | 6 | 0 | 0.969069  | 3.147793  | 0.583941  |
| 15 | 1 | 0 | 1.835264  | 1.240928  | 1.064528  |
| 16 | 6 | 0 | -1.083438 | 3.103743  | -0.653719 |
| 17 | 1 | 0 | -1.857493 | 1.161198  | -1.148551 |
| 18 | 6 | 0 | -0.076976 | 3.875167  | -0.028679 |
| 19 | 1 | 0 | 1.766618  | 3.692960  | 1.082337  |
| 20 | 1 | 0 | -1.901457 | 3.613932  | -1.155374 |
| 21 | 5 | 0 | -0.121005 | 5.436440  | -0.011282 |
| 22 | 6 | 0 | 0.727859  | 6.219629  | 1.080352  |
| 23 | 6 | 0 | -1.027824 | 6.195799  | -1.073806 |
| 24 | 6 | 0 | 1.703216  | 7.182476  | 0.700961  |
| 25 | 6 | 0 | 0.550303  | 5.975208  | 2.467706  |
| 26 | 6 | 0 | -0.827293 | 6.042572  | -2.469317 |
| 27 | 6 | 0 | -2.100445 | 7.034392  | -0.652636 |
| 28 | 6 | 0 | 2.456640  | 7.845450  | 1.673068  |
| 29 | 6 | 0 | 1.991129  | 7.498207  | -0.753004 |
| 30 | 6 | 0 | 1.306365  | 6.681380  | 3.411775  |
| 31 | 6 | 0 | -0.452959 | 4.970213  | 3.006754  |
| 32 | 6 | 0 | -1.666608 | 6.697001  | -3.383118 |
| 33 | 6 | 0 | 0.324494  | 5.249157  | -3.057778 |
| 34 | 6 | 0 | -2.919905 | 7.658094  | -1.594202 |
| 35 | 6 | 0 | -2.424945 | 7.246367  | 0.812332  |
| 36 | 6 | 0 | 2.269323  | 7.618474  | 3.039227  |
| 37 | 1 | 0 | 3.208783  | 8.565454  | 1.354323  |
| 38 | 1 | 0 | 1.101694  | 7.870144  | -1.271248 |
| 39 | 1 | 0 | 2.774174  | 8.258718  | -0.837014 |
| 40 | 1 | 0 | 2.335574  | 6.613409  | -1.302145 |
| 41 | 1 | 0 | 1.136204  | 6.488956  | 4.470210  |
| 42 | 1 | 0 | 0.001192  | 3.979553  | 3.132375  |
| 43 | 1 | 0 | -0.821979 | 5.286878  | 3.988631  |
| 44 | 1 | 0 | -1.316709 | 4.836612  | 2.351779  |
| 45 | 6 | 0 | -2.720841 | 7.506736  | -2.971156 |
| 46 | 1 | 0 | -1.482551 | 6.566210  | -4.448735 |
| 47 | 1 | 0 | 1.104197  | 5.924121  | -3.436094 |
| 48 | 1 | 0 | 0.792529  | 4.578219  | -2.336106 |
| 49 | 1 | 0 | -0.011405 | 4.643842  | -3.908030 |
| 50 | 1 | 0 | -3.742158 | 8.280344  | -1.243889 |
| 51 | 1 | 0 | -2.763952 | 6.319090  | 1.291885  |
| 52 | 1 | 0 | -1.558007 | 7.601168  | 1.377382  |
| 53 | 1 | 0 | -3.228398 | 7.980894  | 0.928590  |
| 54 | 6 | 0 | 3.061007  | 8.384534  | 4.072747  |
| 55 | 6 | 0 | -3.617484 | 8.205960  | -3.965649 |
| 56 | 1 | 0 | 2.617079  | 9.370909  | 4.264605  |
| 57 | 1 | 0 | 3.094388  | 7.851342  | 5.028813  |
| 58 | 1 | 0 | 4.092109  | 8.554991  | 3.743101  |
| 59 | 1 | 0 | -3.521856 | 9.297098  | -3.892447 |
| 60 | 1 | 0 | -3.374348 | 7.919706  | -4.993988 |
| 61 | 1 | 0 | -4.673726 | 7.966106  | -3.791129 |
| 62 | 6 | 0 | 1.260497  | -1.091745 | -0.081238 |
| 63 | 6 | 0 | 1.489333  | -2.189086 | 0.764559  |
| 64 | 6 | 0 | 2.270572  | -0.705969 | -0.977690 |
| 65 | 6 | 0 | 2.692066  | -2.881130 | 0.714829  |
| 66 | 1 | 0 | 0.716417  | -2.494292 | 1.462826  |
| 67 | 6 | 0 | 3.479219  | -1.388611 | -1.016686 |
| 68 | 1 | 0 | 2.100433  | 0.134225  | -1.643437 |

|     |   |   |            |           |           |
|-----|---|---|------------|-----------|-----------|
| 69  | 6 | 0 | 3.717602   | -2.494100 | -0.173235 |
| 70  | 1 | 0 | 2.857361   | -3.725458 | 1.376888  |
| 71  | 1 | 0 | 4.251153   | -1.080600 | -1.715144 |
| 72  | 7 | 0 | 0.020221   | -0.393852 | -0.037528 |
| 73  | 6 | 0 | 4.952479   | -3.197121 | -0.214661 |
| 74  | 6 | 0 | 6.009992   | -3.800880 | -0.243448 |
| 75  | 6 | 0 | 7.242908   | -4.507110 | -0.270660 |
| 76  | 6 | 0 | 7.470408   | -5.614147 | 0.570945  |
| 77  | 6 | 0 | 8.290170   | -4.124835 | -1.132309 |
| 78  | 6 | 0 | 8.673210   | -6.303768 | 0.554522  |
| 79  | 1 | 0 | 6.684944   | -5.929791 | 1.251301  |
| 80  | 6 | 0 | 9.496756   | -4.808032 | -1.156134 |
| 81  | 1 | 0 | 8.148428   | -3.271350 | -1.788786 |
| 82  | 6 | 0 | 9.722775   | -5.925980 | -0.317323 |
| 83  | 1 | 0 | 8.796572   | -7.143416 | 1.227802  |
| 84  | 1 | 0 | 10.270661  | -4.466658 | -1.833019 |
| 85  | 6 | 0 | 12.031564  | -6.106810 | -1.128773 |
| 86  | 1 | 0 | 12.363768  | -5.114468 | -0.785100 |
| 87  | 1 | 0 | 12.874799  | -6.795301 | -1.048315 |
| 88  | 1 | 0 | 11.769789  | -6.026961 | -2.191097 |
| 89  | 6 | 0 | 11.178747  | -7.653239 | 0.640841  |
| 90  | 1 | 0 | 11.180315  | -7.259518 | 1.669511  |
| 91  | 1 | 0 | 10.431425  | -8.454430 | 0.586107  |
| 92  | 1 | 0 | 12.155319  | -8.099956 | 0.445244  |
| 93  | 7 | 0 | 10.918311  | -6.625435 | -0.352504 |
| 94  | 6 | 0 | -4.778758  | -3.416984 | 0.183821  |
| 95  | 6 | 0 | -5.806606  | -4.069300 | 0.224940  |
| 96  | 6 | 0 | -7.003735  | -4.833976 | 0.266682  |
| 97  | 6 | 0 | -7.176836  | -5.966212 | -0.554059 |
| 98  | 6 | 0 | -8.068104  | -4.488207 | 1.122752  |
| 99  | 6 | 0 | -8.343619  | -6.714656 | -0.522374 |
| 100 | 1 | 0 | -6.377433  | -6.254848 | -1.230157 |
| 101 | 6 | 0 | -9.238994  | -5.230348 | 1.161777  |
| 102 | 1 | 0 | -7.968571  | -3.616548 | 1.762919  |
| 103 | 6 | 0 | -9.409538  | -6.374088 | 0.344992  |
| 104 | 1 | 0 | -8.425368  | -7.571407 | -1.180357 |
| 105 | 1 | 0 | -10.028272 | -4.915393 | 1.833708  |
| 106 | 7 | 0 | -10.567781 | -7.132896 | 0.397140  |
| 107 | 6 | 0 | -11.705594 | -6.656071 | 1.164526  |
| 108 | 1 | 0 | -12.089671 | -5.690091 | 0.800313  |
| 109 | 1 | 0 | -12.511830 | -7.389242 | 1.101091  |
| 110 | 1 | 0 | -11.447081 | -6.539558 | 2.224248  |
| 111 | 6 | 0 | -10.776476 | -8.192342 | -0.574826 |
| 112 | 1 | 0 | -10.802936 | -7.819718 | -1.611027 |
| 113 | 1 | 0 | -9.986795  | -8.950774 | -0.507870 |
| 114 | 1 | 0 | -11.726841 | -8.686986 | -0.365859 |

**Table S10:** Coordinates of 1

| Center Number | Atomic Number | Atomic Type | Coordinates (Angstroms) |           |           |
|---------------|---------------|-------------|-------------------------|-----------|-----------|
|               |               |             | X                       | Y         | Z         |
| 1             | 6             | 0           | 3.789002                | 1.057393  | -0.143309 |
| 2             | 6             | 0           | 2.709767                | 0.422500  | 0.512458  |
| 3             | 6             | 0           | 3.512359                | 2.214334  | -0.906319 |
| 4             | 6             | 0           | 1.422284                | 0.916141  | 0.411666  |
| 5             | 1             | 0           | 2.900180                | -0.458787 | 1.117332  |
| 6             | 6             | 0           | 2.225442                | 2.709285  | -1.012566 |
| 7             | 1             | 0           | 4.323450                | 2.712713  | -1.428400 |
| 8             | 6             | 0           | 1.146952                | 2.071069  | -0.357110 |
| 9             | 1             | 0           | 0.615178                | 0.419346  | 0.937255  |
| 10            | 1             | 0           | 2.037544                | 3.590098  | -1.615502 |
| 11            | 6             | 0           | -1.292599               | 1.727680  | -0.323766 |
| 12            | 6             | 0           | -2.384728               | 2.139513  | 0.454739  |
| 13            | 6             | 0           | -1.350687               | 0.491451  | -0.986133 |

|    |   |   |           |           |           |
|----|---|---|-----------|-----------|-----------|
| 14 | 6 | 0 | -3.498121 | 1.315067  | 0.579559  |
| 15 | 1 | 0 | -2.349667 | 3.098410  | 0.962471  |
| 16 | 6 | 0 | -2.477922 | -0.313314 | -0.858725 |
| 17 | 1 | 0 | -0.518441 | 0.176235  | -1.608473 |
| 18 | 6 | 0 | -3.584389 | 0.064115  | -0.067990 |
| 19 | 1 | 0 | -4.326997 | 1.644209  | 1.200538  |
| 20 | 1 | 0 | -2.511256 | -1.257227 | -1.395724 |
| 21 | 5 | 0 | -4.851285 | -0.860229 | 0.078179  |
| 22 | 6 | 0 | -5.781250 | -0.682189 | 1.346935  |
| 23 | 6 | 0 | -5.127340 | -1.945061 | -1.043244 |
| 24 | 6 | 0 | -7.174045 | -0.427531 | 1.201433  |
| 25 | 6 | 0 | -5.258416 | -0.753462 | 2.665316  |
| 26 | 6 | 0 | -5.289982 | -1.588193 | -2.406647 |
| 27 | 6 | 0 | -5.175084 | -3.331317 | -0.714201 |
| 28 | 6 | 0 | -7.976229 | -0.238685 | 2.329009  |
| 29 | 6 | 0 | -7.832257 | -0.316124 | -0.159424 |
| 30 | 6 | 0 | -6.103288 | -0.588840 | 3.769495  |
| 31 | 6 | 0 | -3.793226 | -1.028713 | 2.958175  |
| 32 | 6 | 0 | -5.477781 | -2.578827 | -3.380754 |
| 33 | 6 | 0 | -5.367846 | -0.148926 | -2.879463 |
| 34 | 6 | 0 | -5.351799 | -4.285933 | -1.716341 |
| 35 | 6 | 0 | -4.995124 | -3.826669 | 0.707004  |
| 36 | 6 | 0 | -7.464959 | -0.323391 | 3.627439  |
| 37 | 1 | 0 | -9.035027 | -0.027096 | 2.190129  |
| 38 | 1 | 0 | -7.737843 | -1.243886 | -0.732433 |
| 39 | 1 | 0 | -8.898356 | -0.091474 | -0.055576 |
| 40 | 1 | 0 | -7.388958 | 0.483009  | -0.765744 |
| 41 | 1 | 0 | -5.681696 | -0.671120 | 4.770099  |
| 42 | 1 | 0 | -3.212665 | -0.099465 | 3.014200  |
| 43 | 1 | 0 | -3.686152 | -1.538153 | 3.922004  |
| 44 | 1 | 0 | -3.316253 | -1.653009 | 2.198250  |
| 45 | 6 | 0 | -5.509054 | -3.933785 | -3.061858 |
| 46 | 1 | 0 | -5.609626 | -2.274678 | -4.418145 |
| 47 | 1 | 0 | -6.412353 | 0.139192  | -3.059328 |
| 48 | 1 | 0 | -4.953464 | 0.561747  | -2.162408 |
| 49 | 1 | 0 | -4.834819 | -0.017826 | -3.828326 |
| 50 | 1 | 0 | -5.367169 | -5.339091 | -1.440387 |
| 51 | 1 | 0 | -3.995916 | -3.595062 | 1.097848  |
| 52 | 1 | 0 | -5.719081 | -3.375856 | 1.392085  |
| 53 | 1 | 0 | -5.115716 | -4.913486 | 0.755478  |
| 54 | 6 | 0 | -8.364801 | -0.160942 | 4.829141  |
| 55 | 6 | 0 | -5.718626 | -4.990396 | -4.120387 |
| 56 | 1 | 0 | -8.974975 | -1.059139 | 4.992598  |
| 57 | 1 | 0 | -7.787089 | 0.014002  | 5.742427  |
| 58 | 1 | 0 | -9.058371 | 0.677873  | 4.700333  |
| 59 | 1 | 0 | -6.685366 | -5.494538 | -3.993775 |
| 60 | 1 | 0 | -5.699336 | -4.559117 | -5.126260 |
| 61 | 1 | 0 | -4.945297 | -5.766533 | -4.070778 |
| 62 | 6 | 0 | -0.373230 | 3.970065  | -0.705026 |
| 63 | 6 | 0 | 0.227404  | 4.936429  | 0.113098  |
| 64 | 6 | 0 | -1.212817 | 4.370849  | -1.752098 |
| 65 | 6 | 0 | -0.001581 | 6.290796  | -0.126149 |
| 66 | 1 | 0 | 0.865190  | 4.621864  | 0.933664  |
| 67 | 6 | 0 | -1.448400 | 5.726820  | -1.975147 |
| 68 | 1 | 0 | -1.677923 | 3.618670  | -2.381733 |
| 69 | 6 | 0 | -0.841472 | 6.691143  | -1.167641 |
| 70 | 1 | 0 | 0.465696  | 7.033754  | 0.514188  |
| 71 | 1 | 0 | -2.101911 | 6.029264  | -2.788497 |
| 72 | 7 | 0 | -0.151536 | 2.574711  | -0.460434 |
| 73 | 6 | 0 | 5.103158  | 0.550723  | -0.038100 |
| 74 | 6 | 0 | 6.238797  | 0.111575  | 0.052980  |
| 75 | 6 | 0 | 7.548516  | -0.398801 | 0.161776  |
| 76 | 6 | 0 | 8.639934  | 0.237744  | -0.469511 |
| 77 | 6 | 0 | 7.816558  | -1.570369 | 0.909840  |
| 78 | 6 | 0 | 9.933146  | -0.262390 | -0.362538 |
| 79 | 1 | 0 | 8.465027  | 1.136765  | -1.050228 |
| 80 | 6 | 0 | 9.103832  | -2.073154 | 1.019338  |
| 81 | 1 | 0 | 6.998196  | -2.081486 | 1.404988  |

|    |   |   |           |           |           |
|----|---|---|-----------|-----------|-----------|
| 82 | 6 | 0 | 10.167477 | -1.419975 | 0.383646  |
| 83 | 1 | 0 | 10.727174 | 0.271153  | -0.869270 |
| 84 | 1 | 0 | 9.255106  | -2.974590 | 1.604754  |
| 85 | 7 | 0 | 11.556014 | -2.000415 | 0.531343  |
| 86 | 6 | 0 | 11.945734 | -2.031731 | 1.995905  |
| 87 | 1 | 0 | 11.239742 | -2.653401 | 2.543047  |
| 88 | 1 | 0 | 12.952835 | -2.443985 | 2.082915  |
| 89 | 1 | 0 | 11.913480 | -1.011661 | 2.379014  |
| 90 | 6 | 0 | 12.602642 | -1.196971 | -0.198930 |
| 91 | 1 | 0 | 13.567370 | -1.679066 | -0.038521 |
| 92 | 1 | 0 | 12.368242 | -1.183370 | -1.262706 |
| 93 | 1 | 0 | 12.623766 | -0.184383 | 0.202308  |
| 94 | 6 | 0 | 11.586647 | -3.407399 | -0.031391 |
| 95 | 1 | 0 | 10.879836 | -4.028948 | 0.514811  |
| 96 | 1 | 0 | 11.300910 | -3.360067 | -1.082354 |
| 97 | 1 | 0 | 12.596933 | -3.806970 | 0.075650  |
| 98 | 1 | 0 | -1.024648 | 7.746641  | -1.346186 |

**Table S11:** Coordinates of (1+F)

| Center Number | Atomic Number | Atomic Type | Coordinates (Angstroms) |           |           |
|---------------|---------------|-------------|-------------------------|-----------|-----------|
|               |               |             | X                       | Y         | Z         |
| 1             | 6             | 0           | -1.362339               | 6.989277  | -0.227409 |
| 2             | 6             | 0           | -2.034473               | 6.003263  | -0.953538 |
| 3             | 6             | 0           | -0.314781               | 6.622235  | 0.619426  |
| 4             | 6             | 0           | -1.659832               | 4.665686  | -0.847647 |
| 5             | 1             | 0           | -2.857209               | 6.274260  | -1.609546 |
| 6             | 6             | 0           | 0.060801                | 5.285187  | 0.740134  |
| 7             | 1             | 0           | 0.203136                | 7.376560  | 1.206210  |
| 8             | 6             | 0           | -0.601173               | 4.297103  | -0.004841 |
| 9             | 1             | 0           | -2.186817               | 3.897516  | -1.403581 |
| 10            | 1             | 0           | 0.857139                | 4.999707  | 1.420583  |
| 11            | 6             | 0           | -1.323169               | 1.960109  | 0.235803  |
| 12            | 6             | 0           | -1.486784               | 0.975095  | -0.744614 |
| 13            | 6             | 0           | -2.193362               | 1.999390  | 1.329824  |
| 14            | 6             | 0           | -2.511467               | 0.038414  | -0.616446 |
| 15            | 1             | 0           | -0.803541               | 0.941709  | -1.590848 |
| 16            | 6             | 0           | -3.212493               | 1.053322  | 1.429939  |
| 17            | 1             | 0           | -2.056638               | 2.758352  | 2.097273  |
| 18            | 6             | 0           | -3.419257               | 0.050430  | 0.459718  |
| 19            | 1             | 0           | -2.601655               | -0.735095 | -1.375508 |
| 20            | 1             | 0           | -3.866795               | 1.068437  | 2.296822  |
| 21            | 6             | 0           | 1.060835                | 2.485941  | 0.117976  |
| 22            | 6             | 0           | 2.113318                | 3.264353  | -0.437941 |
| 23            | 6             | 0           | 1.391643                | 1.210224  | 0.652311  |
| 24            | 6             | 0           | 3.408359                | 2.791595  | -0.462745 |
| 25            | 1             | 0           | 1.888916                | 4.231378  | -0.872029 |
| 26            | 6             | 0           | 2.688126                | 0.748415  | 0.631138  |
| 27            | 1             | 0           | 0.607024                | 0.600938  | 1.083489  |
| 28            | 6             | 0           | 3.738531                | 1.520171  | 0.069635  |
| 29            | 1             | 0           | 4.190864                | 3.395296  | -0.913564 |
| 30            | 1             | 0           | 2.916281                | -0.224705 | 1.055572  |
| 31            | 7             | 0           | -0.248272               | 2.920769  | 0.124338  |
| 32            | 1             | 0           | -1.659268               | 8.030863  | -0.312155 |
| 33            | 6             | 0           | 5.049709                | 1.025551  | 0.033429  |
| 34            | 6             | 0           | 6.186251                | 0.567790  | 0.006431  |
| 35            | 6             | 0           | 7.469264                | 0.008570  | -0.025939 |
| 36            | 6             | 0           | 8.573734                | 0.699641  | -0.585387 |
| 37            | 6             | 0           | 7.715177                | -1.288118 | 0.501519  |
| 38            | 6             | 0           | 9.842046                | 0.137119  | -0.622914 |
| 39            | 1             | 0           | 8.420385                | 1.691662  | -0.996053 |
| 40            | 6             | 0           | 8.977813                | -1.852060 | 0.466531  |
| 41            | 1             | 0           | 6.891482                | -1.843347 | 0.936782  |
| 42            | 6             | 0           | 10.050030               | -1.143370 | -0.097415 |

|    |   |   |            |           |           |
|----|---|---|------------|-----------|-----------|
| 43 | 1 | 0 | 10.641695  | 0.717413  | -1.066290 |
| 44 | 1 | 0 | 9.107338   | -2.846840 | 0.882907  |
| 45 | 6 | 0 | -3.994734  | -2.537374 | 0.153016  |
| 46 | 6 | 0 | -3.098242  | -3.292081 | 0.965863  |
| 47 | 6 | 0 | -4.244048  | -3.058671 | -1.145964 |
| 48 | 6 | 0 | -2.546397  | -4.497052 | 0.510491  |
| 49 | 6 | 0 | -3.667665  | -4.266490 | -1.570814 |
| 50 | 6 | 0 | -2.825397  | -5.015997 | -0.753673 |
| 51 | 1 | 0 | -1.868178  | -5.044052 | 1.166905  |
| 52 | 1 | 0 | -3.888343  | -4.627962 | -2.575686 |
| 53 | 6 | 0 | -2.664174  | -2.844363 | 2.351608  |
| 54 | 1 | 0 | -2.310392  | -1.808964 | 2.352494  |
| 55 | 1 | 0 | -3.486859  | -2.880656 | 3.069820  |
| 56 | 1 | 0 | -1.852220  | -3.485834 | 2.717952  |
| 57 | 6 | 0 | -2.249482  | -6.337229 | -1.209854 |
| 58 | 1 | 0 | -2.874128  | -7.186029 | -0.895415 |
| 59 | 1 | 0 | -2.170679  | -6.385495 | -2.302682 |
| 60 | 1 | 0 | -1.248806  | -6.507045 | -0.792773 |
| 61 | 6 | 0 | -5.135661  | -2.361172 | -2.159374 |
| 62 | 1 | 0 | -6.193429  | -2.416718 | -1.883804 |
| 63 | 1 | 0 | -4.901371  | -1.297813 | -2.260862 |
| 64 | 1 | 0 | -5.020719  | -2.823385 | -3.147726 |
| 65 | 9 | 0 | -4.729143  | -1.131156 | 2.161519  |
| 66 | 6 | 0 | -6.145991  | -0.706769 | 0.195203  |
| 67 | 6 | 0 | -6.544276  | 0.404786  | -0.592230 |
| 68 | 6 | 0 | -7.202223  | -1.549112 | 0.659029  |
| 69 | 6 | 0 | -7.897801  | 0.640262  | -0.890219 |
| 70 | 6 | 0 | -8.538866  | -1.287552 | 0.337281  |
| 71 | 6 | 0 | -8.917411  | -0.190016 | -0.437177 |
| 72 | 1 | 0 | -8.156967  | 1.504831  | -1.501787 |
| 73 | 1 | 0 | -9.309261  | -1.965055 | 0.707101  |
| 74 | 6 | 0 | -5.571712  | 1.411926  | -1.183277 |
| 75 | 1 | 0 | -5.035110  | 1.973794  | -0.412319 |
| 76 | 1 | 0 | -4.806679  | 0.942471  | -1.810795 |
| 77 | 1 | 0 | -6.110316  | 2.134727  | -1.808125 |
| 78 | 6 | 0 | -10.369424 | 0.087931  | -0.752591 |
| 79 | 1 | 0 | -10.889158 | -0.814699 | -1.099407 |
| 80 | 1 | 0 | -10.917107 | 0.449205  | 0.129538  |
| 81 | 1 | 0 | -10.469588 | 0.851063  | -1.533060 |
| 82 | 6 | 0 | -6.948740  | -2.772151 | 1.522060  |
| 83 | 1 | 0 | -6.234040  | -3.457584 | 1.055466  |
| 84 | 1 | 0 | -6.518404  | -2.487701 | 2.484888  |
| 85 | 1 | 0 | -7.882201  | -3.320366 | 1.697346  |
| 86 | 5 | 0 | -4.601520  | -1.082424 | 0.709566  |
| 87 | 6 | 0 | 12.463876  | -0.931726 | -0.751347 |
| 88 | 1 | 0 | 12.554338  | -0.006221 | -0.183984 |
| 89 | 1 | 0 | 13.408542  | -1.476150 | -0.728915 |
| 90 | 1 | 0 | 12.180924  | -0.720141 | -1.781824 |
| 91 | 6 | 0 | 11.347469  | -3.091102 | -0.907833 |
| 92 | 1 | 0 | 12.337742  | -3.551505 | -0.914868 |
| 93 | 1 | 0 | 10.626678  | -3.760677 | -0.443098 |
| 94 | 1 | 0 | 11.025231  | -2.852066 | -1.921306 |
| 95 | 6 | 0 | 11.857182  | -2.099046 | 1.299141  |
| 96 | 1 | 0 | 11.136819  | -2.766531 | 1.767873  |
| 97 | 1 | 0 | 12.842030  | -2.570301 | 1.269503  |
| 98 | 1 | 0 | 11.895714  | -1.157905 | 1.847699  |
| 99 | 7 | 0 | 11.410665  | -1.800890 | -0.116851 |

Table S12: Coordinates of 2

| Center Number | Atomic Number | Atomic Type | Coordinates (Angstroms) |           |           |
|---------------|---------------|-------------|-------------------------|-----------|-----------|
|               |               |             | X                       | Y         | Z         |
| 1             | 6             | 0           | 3.778976                | -2.396512 | -0.040267 |
| 2             | 6             | 0           | 3.581473                | -1.175397 | -0.720406 |
| 3             | 6             | 0           | 2.682132                | -2.965151 | 0.641880  |



|    |   |   |           |           |           |
|----|---|---|-----------|-----------|-----------|
| 4  | 6 | 0 | 2.345319  | -0.551290 | -0.718801 |
| 5  | 1 | 0 | 4.409722  | -0.726387 | -1.259373 |
| 6  | 6 | 0 | 1.446181  | -2.337395 | 0.651590  |
| 7  | 1 | 0 | 2.816629  | -3.895553 | 1.184680  |
| 8  | 6 | 0 | 1.254235  | -1.118536 | -0.030143 |
| 9  | 1 | 0 | 2.212392  | 0.382579  | -1.253087 |
| 10 | 1 | 0 | 0.625059  | -2.777902 | 1.206484  |
| 11 | 6 | 0 | -0.000800 | 0.987063  | -0.007567 |
| 12 | 6 | 0 | -0.721024 | 1.680755  | -0.988841 |
| 13 | 6 | 0 | 0.701944  | 1.699214  | 0.972654  |
| 14 | 6 | 0 | -0.725779 | 3.073107  | -0.986145 |
| 15 | 1 | 0 | -1.261702 | 1.126205  | -1.750497 |
| 16 | 6 | 0 | 0.671016  | 3.091423  | 0.969878  |
| 17 | 1 | 0 | 1.254198  | 1.158954  | 1.736296  |
| 18 | 6 | 0 | -0.036539 | 3.820478  | -0.008434 |
| 19 | 1 | 0 | -1.272168 | 3.600636  | -1.763361 |
| 20 | 1 | 0 | 1.198295  | 3.632197  | 1.750682  |
| 21 | 5 | 0 | -0.064266 | 5.402368  | -0.003517 |
| 22 | 6 | 0 | -0.307075 | 6.156820  | -1.369300 |
| 23 | 6 | 0 | 0.167953  | 6.150188  | 1.369190  |
| 24 | 6 | 0 | -1.352032 | 7.115245  | -1.493833 |
| 25 | 6 | 0 | 0.491669  | 5.897189  | -2.515409 |
| 26 | 6 | 0 | -0.641071 | 5.898863  | 2.507369  |
| 27 | 6 | 0 | 1.239327  | 7.080963  | 1.512279  |
| 28 | 6 | 0 | -1.581520 | 7.748556  | -2.717680 |
| 29 | 6 | 0 | -2.267373 | 7.466562  | -0.336993 |
| 30 | 6 | 0 | 0.247458  | 6.576996  | -3.713577 |
| 31 | 6 | 0 | 1.652579  | 4.917168  | -2.507094 |
| 32 | 6 | 0 | -0.372310 | 6.541371  | 3.723656  |
| 33 | 6 | 0 | -1.879946 | 5.024130  | 2.463633  |
| 34 | 6 | 0 | 1.480772  | 7.687330  | 2.745059  |
| 35 | 6 | 0 | 2.171551  | 7.420729  | 0.365789  |
| 36 | 6 | 0 | -0.788223 | 7.503192  | -3.842138 |
| 37 | 1 | 0 | -2.398990 | 8.463162  | -2.793529 |
| 38 | 1 | 0 | -1.718923 | 7.938150  | 0.484734  |
| 39 | 1 | 0 | -3.047573 | 8.161815  | -0.661727 |
| 40 | 1 | 0 | -2.768455 | 6.583932  | 0.077794  |
| 41 | 1 | 0 | 0.888845  | 6.378951  | -4.570905 |
| 42 | 1 | 0 | 1.330637  | 3.906827  | -2.789713 |
| 43 | 1 | 0 | 2.417201  | 5.227355  | -3.227286 |
| 44 | 1 | 0 | 2.134192  | 4.835042  | -1.529077 |
| 45 | 6 | 0 | 0.684729  | 7.435955  | 3.869290  |
| 46 | 1 | 0 | -1.017583 | 6.339552  | 4.577343  |
| 47 | 1 | 0 | -2.786012 | 5.644669  | 2.448188  |
| 48 | 1 | 0 | -1.915988 | 4.374644  | 1.587335  |
| 49 | 1 | 0 | -1.945539 | 4.389960  | 3.355702  |
| 50 | 1 | 0 | 2.315590  | 8.380338  | 2.833786  |
| 51 | 1 | 0 | 2.720939  | 6.541587  | 0.005857  |
| 52 | 1 | 0 | 1.631211  | 7.832654  | -0.491772 |
| 53 | 1 | 0 | 2.915479  | 8.158749  | 0.680987  |
| 54 | 6 | 0 | -1.023823 | 8.241734  | -5.137666 |
| 55 | 6 | 0 | 0.962686  | 8.125328  | 5.183463  |
| 56 | 1 | 0 | -0.538331 | 9.226616  | -5.124632 |
| 57 | 1 | 0 | -0.620162 | 7.691029  | -5.993581 |
| 58 | 1 | 0 | -2.091401 | 8.412125  | -5.314152 |
| 59 | 1 | 0 | 0.822989  | 9.210456  | 5.099736  |
| 60 | 1 | 0 | 0.298115  | 7.764514  | 5.974563  |
| 61 | 1 | 0 | 1.996696  | 7.961528  | 5.510515  |
| 62 | 6 | 0 | -1.216762 | -1.139561 | 0.022746  |
| 63 | 6 | 0 | -1.392200 | -2.358477 | -0.663064 |
| 64 | 6 | 0 | -2.313625 | -0.592048 | 0.717946  |
| 65 | 6 | 0 | -2.618706 | -3.004760 | -0.652383 |
| 66 | 1 | 0 | -0.566104 | -2.784160 | -1.222175 |
| 67 | 6 | 0 | -3.540320 | -1.234514 | 0.720668  |
| 68 | 1 | 0 | -2.192699 | 0.341223  | 1.256148  |
| 69 | 6 | 0 | -3.721805 | -2.455137 | 0.035215  |
| 70 | 1 | 0 | -2.741044 | -3.934694 | -1.198847 |
| 71 | 1 | 0 | -4.373486 | -0.800406 | 1.264231  |

|     |   |   |            |           |           |
|-----|---|---|------------|-----------|-----------|
| 72  | 7 | 0 | 0.013207   | -0.450313 | -0.005337 |
| 73  | 6 | 0 | -4.986772  | -3.095379 | 0.030958  |
| 74  | 6 | 0 | -6.085641  | -3.623009 | 0.032434  |
| 75  | 6 | 0 | -7.373484  | -4.209252 | 0.036012  |
| 76  | 6 | 0 | -7.624696  | -5.437739 | -0.608466 |
| 77  | 6 | 0 | -8.455111  | -3.572511 | 0.686155  |
| 78  | 6 | 0 | -8.894515  | -6.008497 | -0.610058 |
| 79  | 1 | 0 | -6.813101  | -5.948284 | -1.115161 |
| 80  | 6 | 0 | -9.722615  | -4.136321 | 0.687225  |
| 81  | 1 | 0 | -8.289950  | -2.626393 | 1.189763  |
| 82  | 6 | 0 | -9.945180  | -5.356681 | 0.038098  |
| 83  | 1 | 0 | -9.027040  | -6.952390 | -1.122793 |
| 84  | 1 | 0 | -10.520283 | -3.606596 | 1.198077  |
| 85  | 6 | 0 | 5.052217   | -3.019975 | -0.035999 |
| 86  | 6 | 0 | 6.156800   | -3.535585 | -0.036704 |
| 87  | 6 | 0 | 7.449697   | -4.110473 | -0.039154 |
| 88  | 6 | 0 | 7.709222   | -5.339425 | 0.601220  |
| 89  | 6 | 0 | 8.527820   | -3.462556 | -0.684046 |
| 90  | 6 | 0 | 8.983459   | -5.900143 | 0.603548  |
| 91  | 1 | 0 | 6.900494   | -5.858385 | 1.103934  |
| 92  | 6 | 0 | 9.799747   | -4.016372 | -0.684380 |
| 93  | 1 | 0 | 8.356381   | -2.515788 | -1.184330 |
| 94  | 6 | 0 | 10.030446  | -5.237536 | -0.039617 |
| 95  | 1 | 0 | 9.122170   | -6.845004 | 1.112836  |
| 96  | 1 | 0 | 10.594347  | -3.478271 | -1.191236 |
| 97  | 7 | 0 | -11.343149 | -5.933736 | 0.058563  |
| 98  | 7 | 0 | 11.432798  | -5.803913 | -0.059514 |
| 99  | 6 | 0 | 11.871650  | -6.038773 | -1.491971 |
| 100 | 1 | 0 | 11.860939  | -5.093807 | -2.031521 |
| 101 | 1 | 0 | 12.881258  | -6.453437 | -1.484624 |
| 102 | 1 | 0 | 11.172939  | -6.736694 | -1.953661 |
| 103 | 6 | 0 | 11.539766  | -7.120594 | 0.670012  |
| 104 | 1 | 0 | 12.575723  | -7.454543 | 0.607272  |
| 105 | 1 | 0 | 11.260717  | -6.977983 | 1.713416  |
| 106 | 1 | 0 | 10.886942  | -7.850990 | 0.193206  |
| 107 | 6 | 0 | 12.386406  | -4.832992 | 0.609932  |
| 108 | 1 | 0 | 12.378758  | -3.889260 | 0.068081  |
| 109 | 1 | 0 | 12.049506  | -4.674351 | 1.634539  |
| 110 | 1 | 0 | 13.389565  | -5.262970 | 0.596984  |
| 111 | 6 | 0 | -11.777673 | -6.176758 | 1.490943  |
| 112 | 1 | 0 | -11.773039 | -5.233625 | 2.033779  |
| 113 | 1 | 0 | -12.784188 | -6.598866 | 1.483935  |
| 114 | 1 | 0 | -11.073034 | -6.871093 | 1.949028  |
| 115 | 6 | 0 | -11.441525 | -7.248704 | -0.675256 |
| 116 | 1 | 0 | -11.165482 | -7.100480 | -1.718679 |
| 117 | 1 | 0 | -10.782344 | -7.975783 | -0.202126 |
| 118 | 1 | 0 | -12.474833 | -7.590686 | -0.611813 |
| 119 | 6 | 0 | -12.305246 | -4.967727 | -0.605900 |
| 120 | 1 | 0 | -11.971310 | -4.803002 | -1.630513 |
| 121 | 1 | 0 | -13.305075 | -5.405375 | -0.592711 |
| 122 | 1 | 0 | -12.303782 | -4.025857 | -0.060757 |

**Table S13:** Coordinates of (2+F)

| Center<br>Number | Atomic<br>Number | Atomic<br>Type | Coordinates (Angstroms) |           |           |
|------------------|------------------|----------------|-------------------------|-----------|-----------|
|                  |                  |                | X                       | Y         | Z         |
| 1                | 6                | 0              | 3.952380                | -2.623044 | -0.038994 |
| 2                | 6                | 0              | 3.704378                | -1.323036 | -0.539475 |
| 3                | 6                | 0              | 2.867382                | -3.342875 | 0.509483  |
| 4                | 6                | 0              | 2.442359                | -0.766494 | -0.483625 |
| 5                | 1                | 0              | 4.522296                | -0.755408 | -0.972003 |
| 6                | 6                | 0              | 1.600167                | -2.788683 | 0.565895  |
| 7                | 1                | 0              | 3.038683                | -4.334925 | 0.916560  |
| 8                | 6                | 0              | 1.359078                | -1.485042 | 0.073034  |

|    |   |   |            |           |           |
|----|---|---|------------|-----------|-----------|
| 9  | 1 | 0 | 2.272631   | 0.234829  | -0.860786 |
| 10 | 1 | 0 | 0.793667   | -3.346851 | 1.028019  |
| 11 | 6 | 0 | 0.066861   | 0.579232  | 0.278591  |
| 12 | 6 | 0 | -0.510134  | 1.332621  | -0.748383 |
| 13 | 6 | 0 | 0.576950   | 1.218118  | 1.413796  |
| 14 | 6 | 0 | -0.563234  | 2.720598  | -0.632247 |
| 15 | 1 | 0 | -0.917756  | 0.828064  | -1.621967 |
| 16 | 6 | 0 | 0.509640   | 2.607281  | 1.502930  |
| 17 | 1 | 0 | 1.006074   | 0.624151  | 2.218507  |
| 18 | 6 | 0 | -0.042232  | 3.408172  | 0.481170  |
| 19 | 1 | 0 | -1.037505  | 3.289810  | -1.427965 |
| 20 | 1 | 0 | 0.876317   | 3.102926  | 2.397003  |
| 21 | 6 | 0 | -1.109742  | -1.554737 | 0.185335  |
| 22 | 6 | 0 | -1.302435  | -2.761494 | -0.525326 |
| 23 | 6 | 0 | -2.211937  | -0.993693 | 0.869639  |
| 24 | 6 | 0 | -2.544691  | -3.372923 | -0.557410 |
| 25 | 1 | 0 | -0.480256  | -3.191971 | -1.086061 |
| 26 | 6 | 0 | -3.447860  | -1.607471 | 0.838839  |
| 27 | 1 | 0 | -2.079481  | -0.065748 | 1.412799  |
| 28 | 6 | 0 | -3.649153  | -2.808462 | 0.118331  |
| 29 | 1 | 0 | -2.680894  | -4.283891 | -1.132505 |
| 30 | 1 | 0 | -4.282155  | -1.161195 | 1.370781  |
| 31 | 7 | 0 | 0.109710   | -0.866153 | 0.176768  |
| 32 | 6 | 0 | -4.937931  | -3.381278 | 0.059641  |
| 33 | 6 | 0 | -6.079191  | -3.815173 | 0.025686  |
| 34 | 6 | 0 | -7.423965  | -4.233106 | -0.006959 |
| 35 | 6 | 0 | -7.839258  | -5.373579 | -0.729358 |
| 36 | 6 | 0 | -8.417959  | -3.497644 | 0.684946  |
| 37 | 6 | 0 | -9.175331  | -5.758240 | -0.772493 |
| 38 | 1 | 0 | -7.101050  | -5.957950 | -1.267610 |
| 39 | 6 | 0 | -9.749526  | -3.877015 | 0.645545  |
| 40 | 1 | 0 | -8.127295  | -2.618280 | 1.249088  |
| 41 | 6 | 0 | -10.133873 | -5.007949 | -0.086777 |
| 42 | 1 | 0 | -9.432381  | -6.638206 | -1.348184 |
| 43 | 1 | 0 | -10.471568 | -3.275477 | 1.188556  |
| 44 | 6 | 0 | -1.600645  | 5.524619  | 0.037049  |
| 45 | 6 | 0 | -2.817164  | 5.335402  | 0.756134  |
| 46 | 6 | 0 | -1.731566  | 6.046909  | -1.279023 |
| 47 | 6 | 0 | -4.052564  | 5.691956  | 0.198855  |
| 48 | 6 | 0 | -2.987215  | 6.386673  | -1.807065 |
| 49 | 6 | 0 | -4.165859  | 6.233468  | -1.081140 |
| 50 | 1 | 0 | -4.957489  | 5.534273  | 0.787040  |
| 51 | 1 | 0 | -3.038888  | 6.784825  | -2.820745 |
| 52 | 6 | 0 | -2.866515  | 4.727352  | 2.147792  |
| 53 | 1 | 0 | -2.317780  | 3.781643  | 2.198880  |
| 54 | 1 | 0 | -2.408417  | 5.380408  | 2.894181  |
| 55 | 1 | 0 | -3.907155  | 4.537572  | 2.440284  |
| 56 | 6 | 0 | -5.504062  | 6.648350  | -1.648571 |
| 57 | 1 | 0 | -5.747977  | 7.690346  | -1.396457 |
| 58 | 1 | 0 | -5.518613  | 6.572456  | -2.742489 |
| 59 | 1 | 0 | -6.318359  | 6.026330  | -1.256761 |
| 60 | 6 | 0 | -0.545905  | 6.273458  | -2.201485 |
| 61 | 1 | 0 | 0.079085   | 7.108546  | -1.870393 |
| 62 | 1 | 0 | 0.112683   | 5.401968  | -2.259932 |
| 63 | 1 | 0 | -0.893068  | 6.495856  | -3.217882 |
| 64 | 9 | 0 | -0.213424  | 5.175456  | 2.163988  |
| 65 | 6 | 0 | 1.180527   | 5.960479  | 0.294990  |
| 66 | 6 | 0 | 2.331728   | 5.536089  | -0.417692 |
| 67 | 6 | 0 | 1.204144   | 7.307697  | 0.768349  |
| 68 | 6 | 0 | 3.412896   | 6.405685  | -0.642190 |
| 69 | 6 | 0 | 2.295342   | 8.147924  | 0.520114  |
| 70 | 6 | 0 | 3.421380   | 7.718922  | -0.183984 |
| 71 | 1 | 0 | 4.274548   | 6.038706  | -1.200659 |
| 72 | 1 | 0 | 2.262562   | 9.172499  | 0.891362  |
| 73 | 6 | 0 | 2.495051   | 4.142737  | -1.003224 |
| 74 | 1 | 0 | 2.522000   | 3.367847  | -0.229621 |
| 75 | 1 | 0 | 1.680831   | 3.872292  | -1.684029 |
| 76 | 1 | 0 | 3.431542   | 4.079705  | -1.571017 |

|     |   |   |            |           |           |
|-----|---|---|------------|-----------|-----------|
| 77  | 6 | 0 | 4.596974   | 8.638130  | -0.424588 |
| 78  | 1 | 0 | 4.277445   | 9.608486  | -0.825862 |
| 79  | 1 | 0 | 5.149078   | 8.845743  | 0.502865  |
| 80  | 1 | 0 | 5.306546   | 8.201003  | -1.136642 |
| 81  | 6 | 0 | 0.062779   | 7.910922  | 1.567228  |
| 82  | 1 | 0 | -0.904417  | 7.750036  | 1.082137  |
| 83  | 1 | 0 | -0.008649  | 7.450009  | 2.555771  |
| 84  | 1 | 0 | 0.208419   | 8.990441  | 1.691699  |
| 85  | 5 | 0 | -0.149750  | 5.044541  | 0.713807  |
| 86  | 6 | 0 | -11.876248 | -6.607022 | -0.937612 |
| 87  | 1 | 0 | -11.335567 | -7.452414 | -0.513407 |
| 88  | 1 | 0 | -12.949038 | -6.799284 | -0.905118 |
| 89  | 1 | 0 | -11.563137 | -6.429339 | -1.965815 |
| 90  | 6 | 0 | -12.402234 | -4.236666 | -0.713065 |
| 91  | 1 | 0 | -13.455903 | -4.521756 | -0.734860 |
| 92  | 1 | 0 | -12.269356 | -3.344224 | -0.104781 |
| 93  | 1 | 0 | -12.031535 | -4.053313 | -1.721655 |
| 94  | 6 | 0 | -12.087437 | -5.649101 | 1.295126  |
| 95  | 1 | 0 | -11.953060 | -4.755617 | 1.901649  |
| 96  | 1 | 0 | -13.144457 | -5.919445 | 1.255735  |
| 97  | 1 | 0 | -11.495544 | -6.466563 | 1.707144  |
| 98  | 7 | 0 | -11.600621 | -5.375231 | -0.113637 |
| 99  | 6 | 0 | 5.260539   | -3.151582 | -0.062711 |
| 100 | 6 | 0 | 6.411933   | -3.559083 | -0.084549 |
| 101 | 6 | 0 | 7.760171   | -3.965724 | -0.094509 |
| 102 | 6 | 0 | 8.161206   | -5.233963 | 0.381600  |
| 103 | 6 | 0 | 8.770826   | -3.097342 | -0.576375 |
| 104 | 6 | 0 | 9.497966   | -5.617422 | 0.388579  |
| 105 | 1 | 0 | 7.409884   | -5.921265 | 0.754824  |
| 106 | 6 | 0 | 10.103815  | -3.474586 | -0.571403 |
| 107 | 1 | 0 | 8.492302   | -2.117699 | -0.948894 |
| 108 | 6 | 0 | 10.472899  | -4.736278 | -0.086224 |
| 109 | 1 | 0 | 9.742759   | -6.600730 | 0.769695  |
| 110 | 1 | 0 | 10.839034  | -2.768969 | -0.945832 |
| 111 | 6 | 0 | 12.481631  | -5.060597 | -1.500232 |
| 112 | 1 | 0 | 12.359796  | -4.057607 | -1.904420 |
| 113 | 1 | 0 | 13.539495  | -5.329497 | -1.479242 |
| 114 | 1 | 0 | 11.915295  | -5.771867 | -2.101684 |
| 115 | 6 | 0 | 12.196267  | -6.481635 | 0.459743  |
| 116 | 1 | 0 | 11.674560  | -7.213269 | -0.156196 |
| 117 | 1 | 0 | 13.270665  | -6.663954 | 0.422323  |
| 118 | 1 | 0 | 11.848317  | -6.531463 | 1.490914  |
| 119 | 6 | 0 | 12.709892  | -4.119419 | 0.777662  |
| 120 | 1 | 0 | 12.588411  | -3.115420 | 0.375953  |
| 121 | 1 | 0 | 12.303282  | -4.163425 | 1.788145  |
| 122 | 1 | 0 | 13.765067  | -4.399818 | 0.773583  |
| 123 | 7 | 0 | 11.940522  | -5.099812 | -0.085317 |

Table S14: Molecular orbital of BTPA-NMe<sub>2</sub>, BTPA-2NMe<sub>2</sub>, 1 and 2.

*BTPA-NMe<sub>2</sub>*      *BTPA-2NMe<sub>2</sub>*      *1*      *2*

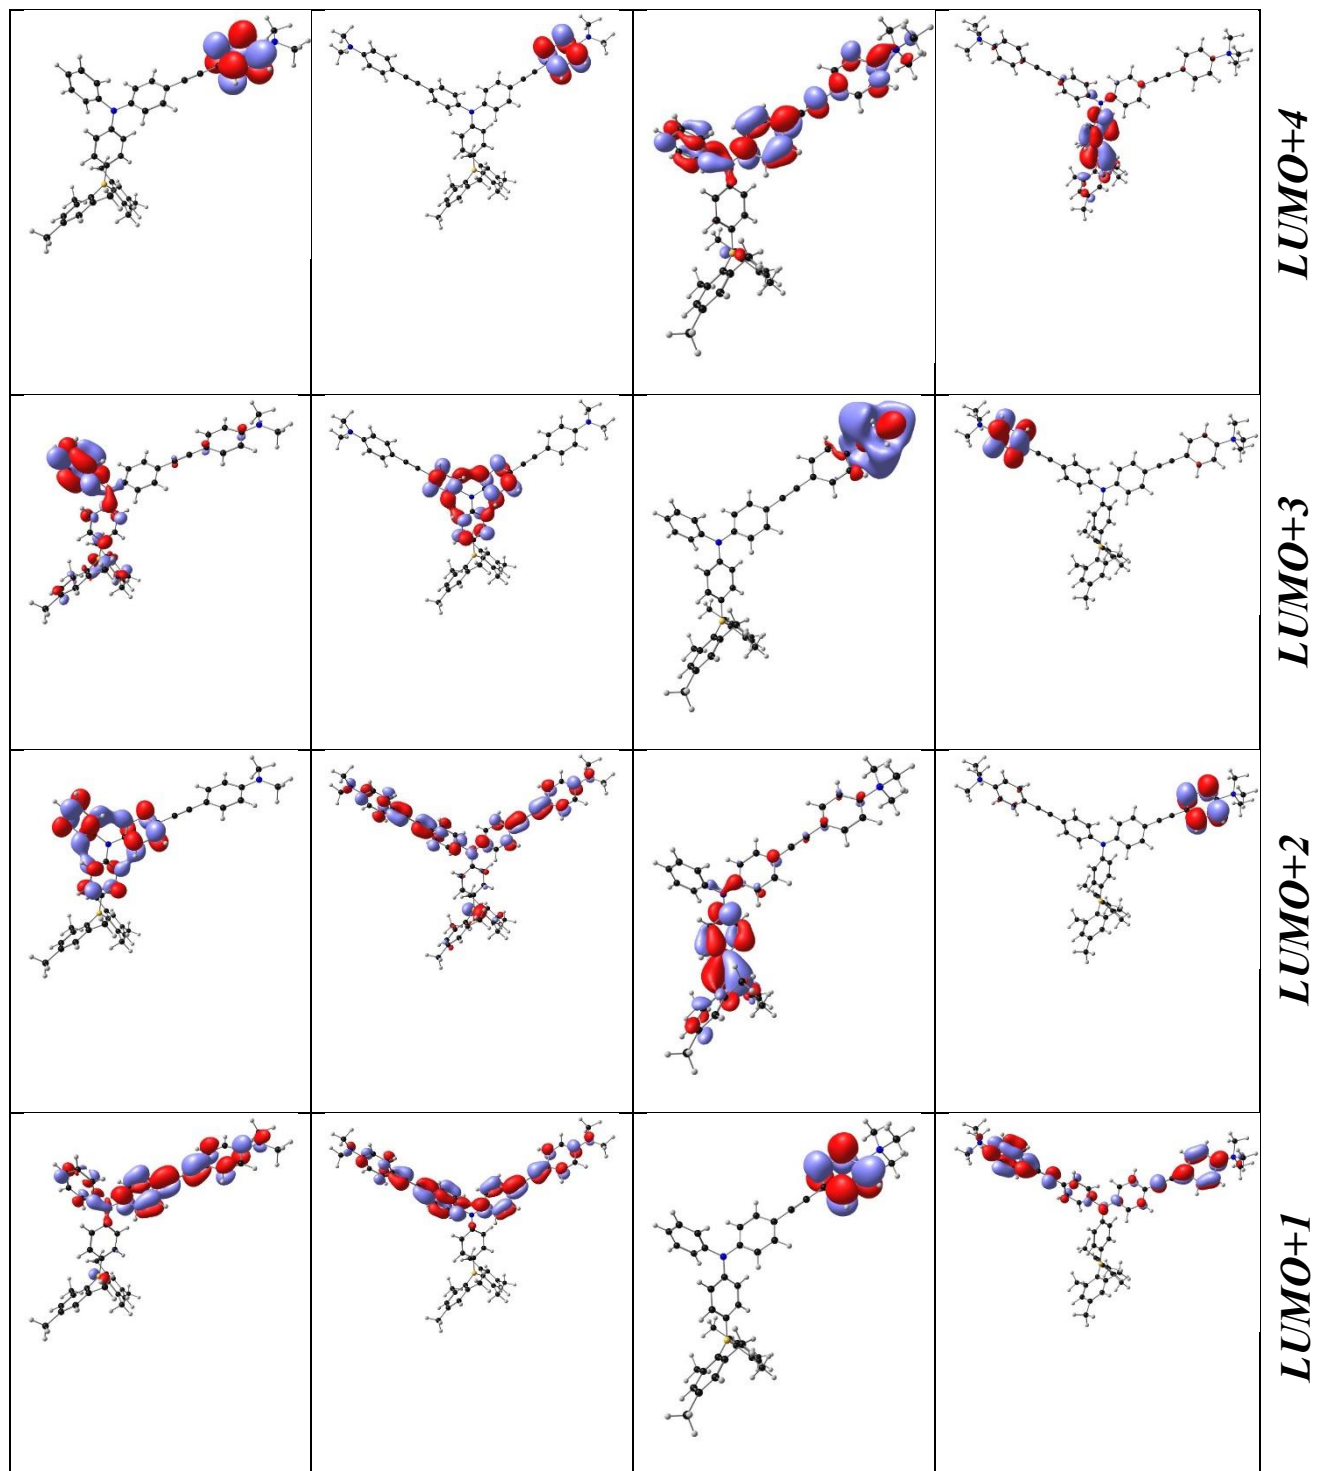

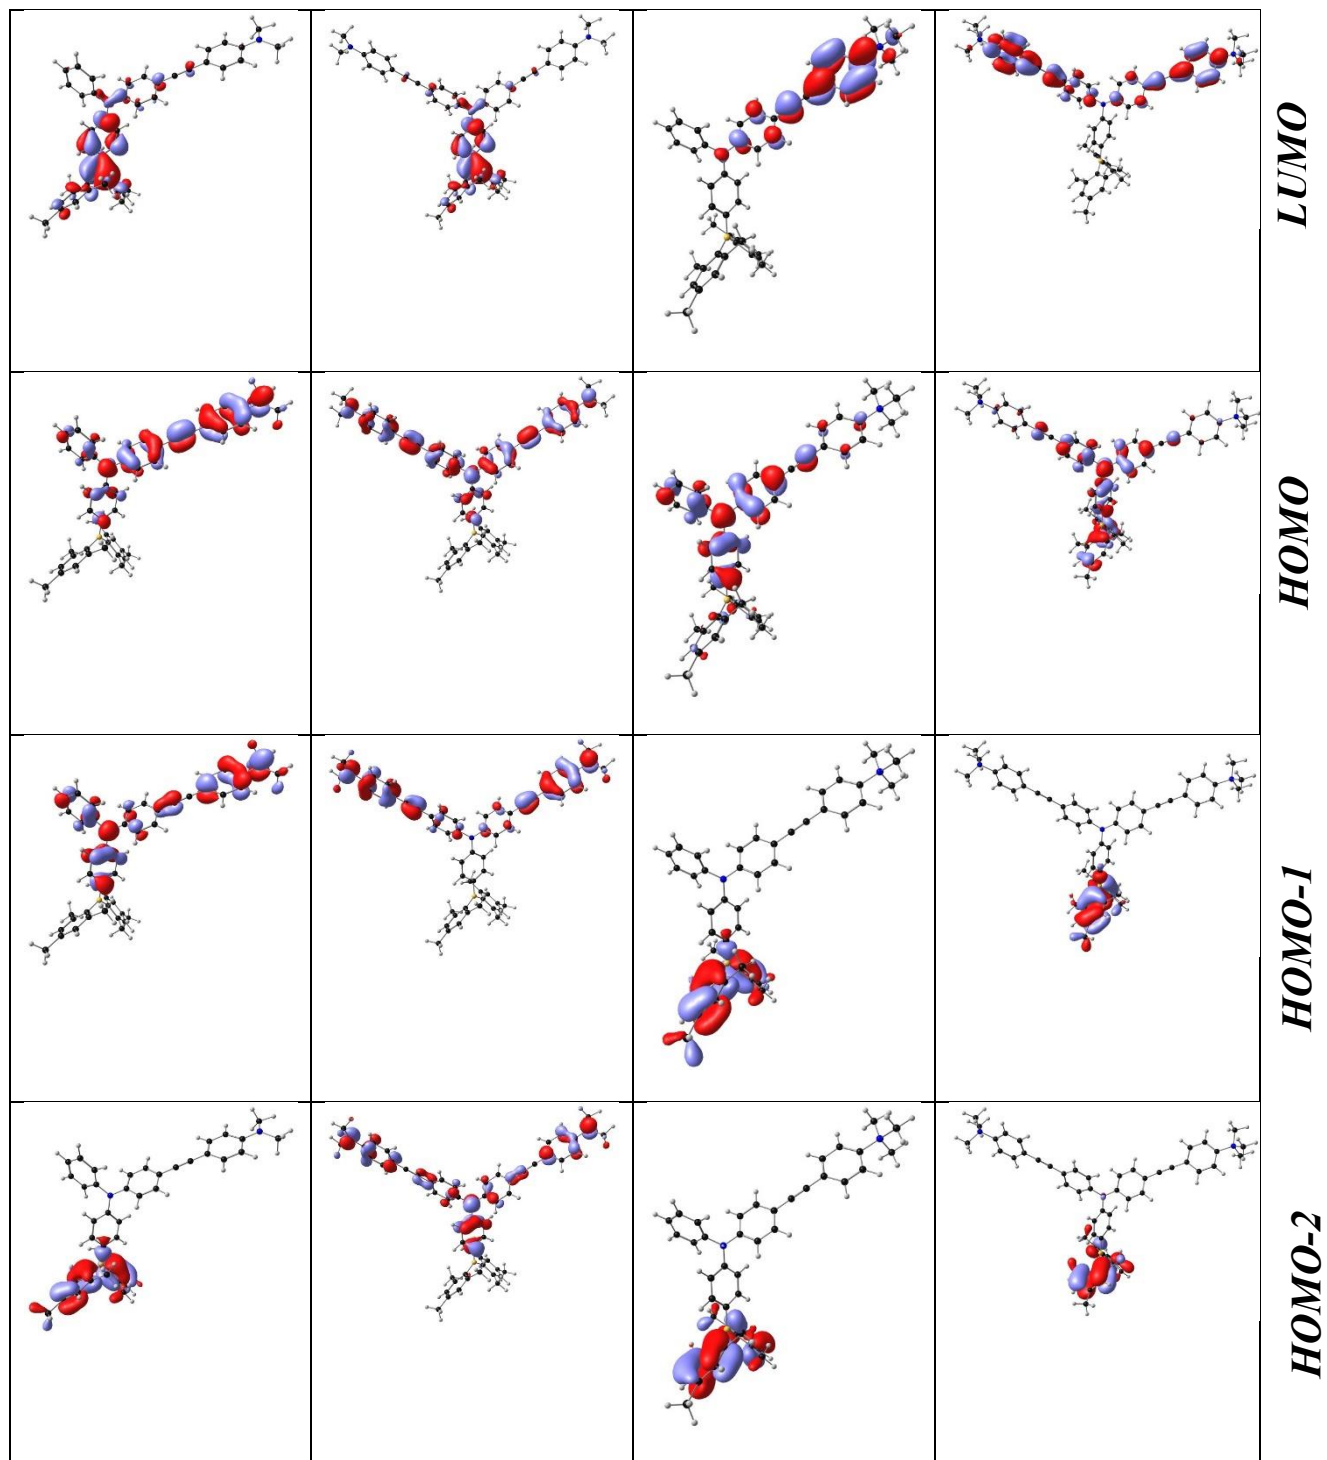

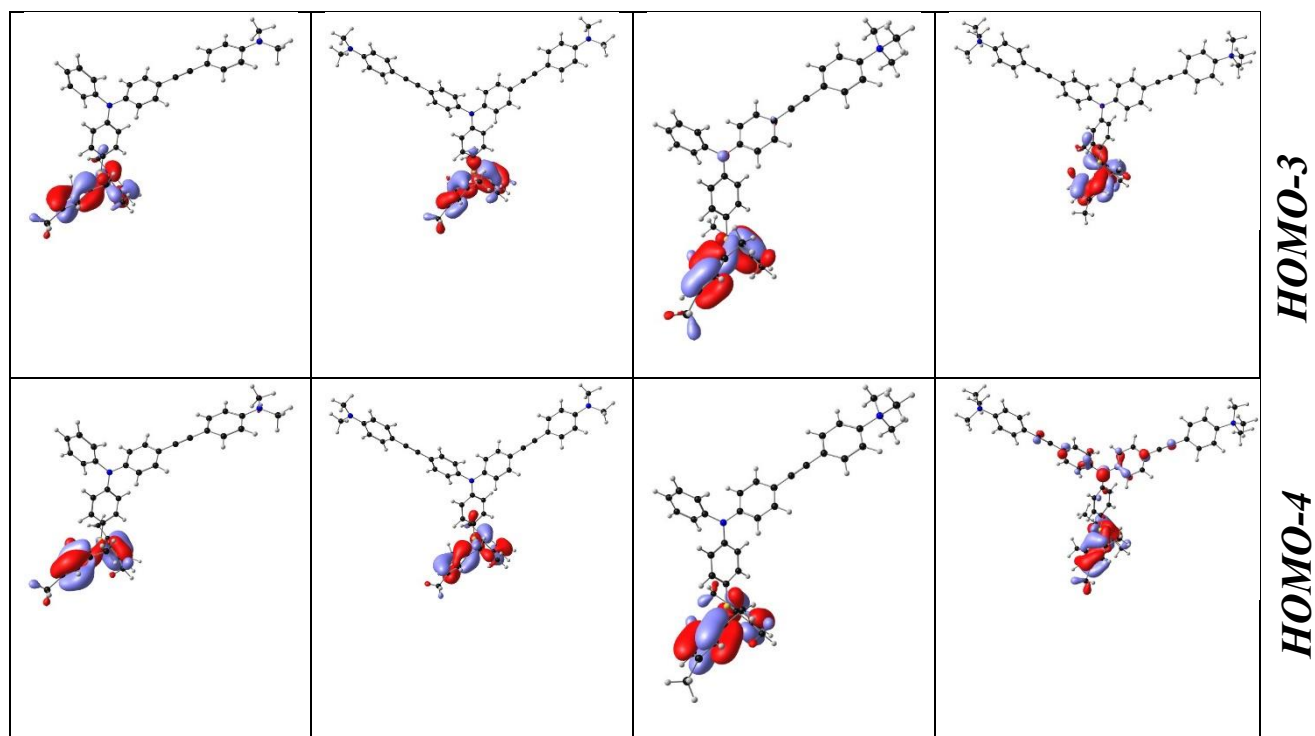

**Table S15:** Comparison of water soluble main group organometallic compounds (their physical parameters associated with fluoride)

| Molecule                                                                                  | Association constant             | Detection limit      |
|-------------------------------------------------------------------------------------------|----------------------------------|----------------------|
| 1)<br>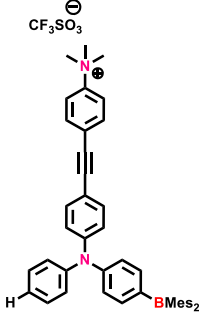 | $0.3 \times 10^5 \text{ M}^{-1}$ | 87.2 ppm (this work) |
| 2)                                                                                        | $2.7 \times 10^5 \text{ M}^{-1}$ | 0.1 ppm (this work)  |

|                                                                                                           |                                           |                                |
|-----------------------------------------------------------------------------------------------------------|-------------------------------------------|--------------------------------|
| 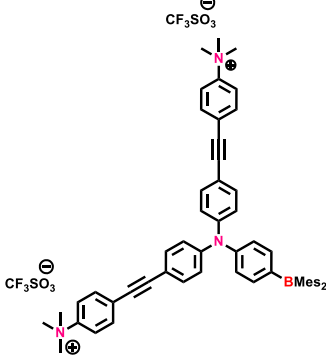                         |                                           |                                |
| <p>1)<sup>4</sup></p>    | $1.0(\pm 0.1) \times 10^3 \text{ M}^{-1}$ | -                              |
| <p>2)<sup>5</sup></p>  | $13,500 (\pm 1400 \text{ M}^{-1})$        | -                              |
| <p>3)<sup>5</sup></p>  | $16,100 (\pm 1100) \text{ M}^{-1}$        | $5.0 \times 10^{-4} \text{ M}$ |
| <p>4)<sup>6</sup></p>                                                                                     | $910 ((50) \text{ M}^{-1})$               | -                              |



|                                                                                                           |                                            |                             |
|-----------------------------------------------------------------------------------------------------------|--------------------------------------------|-----------------------------|
| 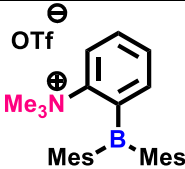                         |                                            |                             |
| <p>5)<sup>7</sup></p>    | $12000 \pm 1100 \text{ M}^{-1}$            | $1.04 \pm 0.01 \text{ ppm}$ |
| <p>6)<sup>8</sup></p>   | $5.0 (\pm 0.5) \times 10^6 \text{ M}^{-1}$ | -                           |
| <p>7)<sup>9</sup></p>  | $840(\pm 50) \text{ M}^{-1}$               | $< 4 \text{ ppm}$           |
| <p>8)<sup>9</sup></p>                                                                                     | $2500(\pm 200) \text{ M}^{-1}$             | $< 4 \text{ ppm}$           |

|                                                                                                             |                                          |                                     |
|-------------------------------------------------------------------------------------------------------------|------------------------------------------|-------------------------------------|
| 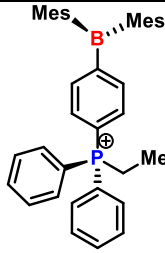                           |                                          |                                     |
| <p>9)<sup>9</sup></p>      | <p>4000(±300) M<sup>-1</sup></p>         | <p>&lt; 4 ppm</p>                   |
| <p>10)<sup>9</sup></p>    | <p>10,500(±1000) M<sup>-1</sup></p>      | <p>&lt; 4 ppm</p>                   |
| <p>11)<sup>10</sup></p>  | <p>10 000 ± 500 M<sup>-1</sup></p>       | <p>0.48 (±0.03) ppm (top water)</p> |
| <p>12)<sup>11</sup></p>                                                                                     | <p>&gt;10<sup>7</sup> M<sup>-1</sup></p> | <p>0.25 μM</p>                      |

|                                                                                                           |                            |            |
|-----------------------------------------------------------------------------------------------------------|----------------------------|------------|
| 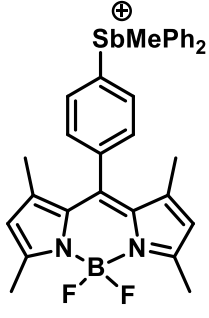                         |                            |            |
| <p>13)<sup>12</sup></p>  | $\geq 10^5 \text{ M}^{-1}$ | <p>---</p> |

## Reference

- Kim, Y.; Zhao, H.; Gabbai, F. P. Sulfonium Boranes for the Selective Capture of Cyanide Ions in Water. *Angew. Chem. Int. Ed.* **2009**, *48*, 4957-4960.
- (a) Chen, Y.; Zhao, J.; Guo, H.; Xie, L. Geometry relaxation-induced large Stokes shift in red-emitting borondipyrromethenes (BODIPY) and applications in fluorescent thiol probes. *J. Org. Chem.* **2012**, *77*, 2192-2206. (b) Liu, X. Y.; Bai, D. R.; Wang, S. Charge-Transfer Emission in Nonplanar Three-Coordinate Organoboron Compounds for Fluorescent Sensing of Fluoride. *Angew. Chem. Int. Ed.* **2006**, *45*, 5475-5478.
- Gaussian 09, Revision A.02, M. J. Frisch, G. W. Trucks, H. B. Schlegel, G. E. Scuseria, M. A. Robb, J. R. Cheeseman, G. Scalmani, V. Barone, B. Mennucci, G. A. Petersson, H. Nakatsuji, M. Caricato, X. Li, H. P. Hratchian, A. F. Izmaylov, J. Bloino, G. Zheng, J. L. Sonnenberg, M. Hada, M. Ehara, K. Toyota, R. Fukuda, J. Hasegawa, M. Ishida, T. Nakajima, Y. Honda, O. Kitao, H. Nakai, T. Vreven, J. A. Montgomery, Jr., J. E. Peralta, F. Ogliaro, M. Bearpark, J. J. Heyd, E. Brothers, K. N. Kudin, V. N. Staroverov, R. Kobayashi, J. Normand, K. Raghavachari, A. Rendell, J. C. Burant, S. S. Iyengar, J. Tomasi, M. Cossi, N. Rega, J. M. Millam, M. Klene, J. E. Knox, J. B. Cross, V. Bakken, C. Adamo, J. Jaramillo, R. Gomperts, R. E. Stratmann, O. Yazyev, A. J. Austin, R. Cammi, C. Pomelli, J. W. Ochterski, R. L. Martin, K. Morokuma, V. G. Zakrzewski, G. A. Voth, P. Salvador, J. J. Dannenberg, S. Dapprich, A. D. Daniels, O. Farkas, J. B. Foresman, J. V. Ortiz, J. Cioslowski, and D. J. Fox, Gaussian, Inc., Wallingford CT, **2009**.
- M.H. Lee, T. Agou, J. Kobayashi, T. Kawashima, and F.P. Gabbai, *Chem. comm.* 2007, **11**, 1133-1135.
- M. Hirai, and F.P. Gabbai, *Chem. Sci.* 2014, **5**, 1886-1893.
- T. W. Hudnall, and F.P. Gabbai, *J. Am. Chem. Soc.* 2007, **129** (39), 11978-11986.

7. I. S. Ke, M. Myahkostupov, F. N. Castellano, and F.P. Gabbai, *J. Am. Chem. Soc.* 2012, **134** (37), 15309-15311.
8. C. W. Chiu, and F. P. Gabbai, *J. Am. Chem. Soc.* 2006, **128** (44), 14248-14249.
9. Y. Kim, and F. P. Gabbai, *J. Am. Chem. Soc.* 2009, **131** (9), 3363-3369.
10. M. Hirai, M. Myahkostupov, F. N. Castellano, and F. P. Gabbai, *Organometallics* 2016, **35**, 11, 1854–1860.
11. A. M. Christianson and F. P. Gabbai, *Chem. Commun.*, 2017, **53**, 2471—2474.
12. H. Zhao and F. P. Gabbai, *Organometallics* 2012, **31**, 6, 2327–2335.
